# Supplementary material for: Factors affecting women’s access to primary care in the United States since the Affordable Care Act: A mixed-methods systematic review
Source: PubMed Central journal article supplement (PMC11658587; doi:10.1371/journal.pone.0314620), 2024-12-19
Supplement: pone.0314620.s002.pdf [file pone.0314620.s002.pdf]

## S2 File. Database search strategies.

### MEDLINE search strategy

| #   | Query                                                                                                                                                                            | Limiters/Expanders                                                                                                                                                                                    | Last Run Via                                                                                                  |
|-----|----------------------------------------------------------------------------------------------------------------------------------------------------------------------------------|-------------------------------------------------------------------------------------------------------------------------------------------------------------------------------------------------------|---------------------------------------------------------------------------------------------------------------|
| S15 | S11 AND S14                                                                                                                                                                      | Limiters - Date of Publication: 20100101-; Abstract Available; English Language; Human; Age Related: All Adult: 19+ years; Scholarly (Peer Reviewed) Journals Search modes - Find all my search terms | Interface - EBSCOhost<br>Research Databases<br>Search Screen - Advanced Search<br>Database - MEDLINE Complete |
| S14 | S12 OR S13                                                                                                                                                                       | Search modes - Find all my search terms                                                                                                                                                               | Interface - EBSCOhost<br>Research Databases<br>Search Screen - Advanced Search<br>Database - MEDLINE Complete |
| S13 | AB ( woman* OR women* OR female* OR gender* OR mother* ) OR TI ( woman* OR women* OR female* OR gender* OR mother* )                                                             | Search modes - Find all my search terms                                                                                                                                                               | Interface - EBSCOhost<br>Research Databases<br>Search Screen - Advanced Search<br>Database - MEDLINE Complete |
| S12 | (MH "Women+") OR (MH "Female") OR (MH "Gender Identity+")                                                                                                                        | Search modes - Find all my search terms                                                                                                                                                               | Interface - EBSCOhost<br>Research Databases<br>Search Screen - Advanced Search<br>Database - MEDLINE Complete |
| S11 | S7 AND S10                                                                                                                                                                       | Search modes - Find all my search terms                                                                                                                                                               | Interface - EBSCOhost<br>Research Databases<br>Search Screen - Advanced Search<br>Database - MEDLINE Complete |
| S10 | S8 OR S9                                                                                                                                                                         | Search modes - Find all my search terms                                                                                                                                                               | Interface - EBSCOhost<br>Research Databases<br>Search Screen - Advanced Search<br>Database - MEDLINE Complete |
| S9  | AB ( "united states" OR america OR usa OR u.s.a OR u.s OR "united states of america" ) OR TI ( "united states" OR america OR usa OR u.s.a OR u.s OR "united states of america" ) | Search modes - Find all my search terms                                                                                                                                                               | Interface - EBSCOhost<br>Research Databases<br>Search Screen - Advanced Search<br>Database - MEDLINE Complete |
| S8  | (MH "United States+")                                                                                                                                                            | Search modes - Find all my search terms                                                                                                                                                               | Interface - EBSCOhost<br>Research Databases<br>Search Screen - Advanced Search<br>Database - MEDLINE Complete |
| S7  | S3 AND S6                                                                                                                                                                        | Search modes - Find all my search terms                                                                                                                                                               | Interface - EBSCOhost<br>Research Databases<br>Search Screen - Advanced Search<br>Database - MEDLINE Complete |
| S6  | S4 OR S5                                                                                                                                                                         | Search modes - Find all my search terms                                                                                                                                                               | Interface - EBSCOhost<br>Research Databases<br>Search Screen - Advanced Search                                |

| #  | Query                                                                                                                                                                                                                                  | Limiters/Expanders                      | Last Run Via                                                                                                     |
|----|----------------------------------------------------------------------------------------------------------------------------------------------------------------------------------------------------------------------------------------|-----------------------------------------|------------------------------------------------------------------------------------------------------------------|
|    |                                                                                                                                                                                                                                        |                                         | Database - MEDLINE Complete                                                                                      |
| S5 | AB ( (access* OR avail* OR use OR usage OR acceptance OR utili*) N5 (healthcare OR "health care" OR health-care ) OR TI ( (access* OR avail* OR use OR usage OR acceptance OR utili*) N5 (healthcare OR "health care" OR health-care ) | Search modes - Find all my search terms | Interface - EBSCOhost<br>Research Databases<br>Search Screen -<br>Advanced Search<br>Database - MEDLINE Complete |
| S4 | (MH "Health Services Accessibility+") OR (MH "Health Services Needs and Demand+")                                                                                                                                                      | Search modes - Find all my search terms | Interface - EBSCOhost<br>Research Databases<br>Search Screen -<br>Advanced Search<br>Database - MEDLINE Complete |
| S3 | S1 OR S2                                                                                                                                                                                                                               | Search modes - Find all my search terms | Interface - EBSCOhost<br>Research Databases<br>Search Screen -<br>Advanced Search<br>Database - MEDLINE Complete |
| S2 | AB ( (primary OR preventative OR preventive) N5 (care OR "health care" OR healthcare OR medicine OR service*) ) OR TI ( (primary OR preventative OR preventive) N5 (care OR "health care" OR healthcare OR medicine OR service*) )     | Search modes - Find all my search terms | Interface - EBSCOhost<br>Research Databases<br>Search Screen -<br>Advanced Search<br>Database - MEDLINE Complete |
| S1 | (MH "Primary Health Care+") OR (MH "Preventive Health Services+") OR (MH "Preventive Medicine+") OR (MH "Women's Health Services+")                                                                                                    | Search modes - Find all my search terms | Interface - EBSCOhost<br>Research Databases<br>Search Screen -<br>Advanced Search<br>Database - MEDLINE Complete |

### CINAHL search strategy

| #   | Query       | Limiters/Expanders                                                                                                                                                       | Last Run Via                                                                                        |
|-----|-------------|--------------------------------------------------------------------------------------------------------------------------------------------------------------------------|-----------------------------------------------------------------------------------------------------|
| S16 | S11 AND S14 | Limiters - Abstract Available;<br>Published Date: 20100101-;<br>English Language; Peer Reviewed; Human; Age Groups: All Adult<br>Search modes - Find all my search terms | Interface - EBSCOhost<br>Research Databases Search<br>Screen - Advanced Search<br>Database - CINAHL |
| S15 | S11 AND S14 | Search modes - Find all my search terms                                                                                                                                  | Interface - EBSCOhost<br>Research Databases Search<br>Screen - Advanced Search<br>Database - CINAHL |
| S14 | S12 OR S13  | Search modes - Find all my search terms                                                                                                                                  | Interface - EBSCOhost<br>Research Databases Search<br>Screen - Advanced Search<br>Database - CINAHL |

| #   | Query                                                                                                                                                                                                                                    | Limiters/Expanders                      | Last Run Via                                                                                        |
|-----|------------------------------------------------------------------------------------------------------------------------------------------------------------------------------------------------------------------------------------------|-----------------------------------------|-----------------------------------------------------------------------------------------------------|
| S13 | AB ( ( woman* OR women* OR female* OR gender* OR mother* ) OR TI ( woman* OR women* OR female* OR gender* OR mother* ) )                                                                                                                 | Search modes - Find all my search terms | Interface - EBSCOhost<br>Research Databases Search<br>Screen - Advanced Search<br>Database - CINAHL |
| S12 | (MH "Female") OR (MH "Women+") OR (MH "Gender Identity+")                                                                                                                                                                                | Search modes - Find all my search terms | Interface - EBSCOhost<br>Research Databases Search<br>Screen - Advanced Search<br>Database - CINAHL |
| S11 | S7 AND S10                                                                                                                                                                                                                               | Search modes - Find all my search terms | Interface - EBSCOhost<br>Research Databases Search<br>Screen - Advanced Search<br>Database - CINAHL |
| S10 | S8 OR S9                                                                                                                                                                                                                                 | Search modes - Find all my search terms | Interface - EBSCOhost<br>Research Databases Search<br>Screen - Advanced Search<br>Database - CINAHL |
| S9  | AB ( ( "united states" OR america OR usa OR u.s.a OR u.s or "united states of america" ) OR TI ( "united states" OR america OR usa OR u.s.a OR u.s or "united states of america" ) )                                                     | Search modes - Find all my search terms | Interface - EBSCOhost<br>Research Databases Search<br>Screen - Advanced Search<br>Database - CINAHL |
| S8  | (MH "United States+")                                                                                                                                                                                                                    | Search modes - Find all my search terms | Interface - EBSCOhost<br>Research Databases Search<br>Screen - Advanced Search<br>Database - CINAHL |
| S7  | S3 AND S6                                                                                                                                                                                                                                | Search modes - Find all my search terms | Interface - EBSCOhost<br>Research Databases Search<br>Screen - Advanced Search<br>Database - CINAHL |
| S6  | S4 OR S5                                                                                                                                                                                                                                 | Search modes - Find all my search terms | Interface - EBSCOhost<br>Research Databases Search<br>Screen - Advanced Search<br>Database - CINAHL |
| S5  | AB ( (access* OR avail* OR use OR usage OR acceptance OR utili*) N5 (healthcare OR "health care" OR health-care) ) OR TI ( (access* OR avail* OR use OR usage OR acceptance OR utili*) N5 (healthcare OR "health care" OR health-care) ) | Search modes - Find all my search terms | Interface - EBSCOhost<br>Research Databases Search<br>Screen - Advanced Search<br>Database - CINAHL |
| S4  | (MH "Health Services Accessibility+") OR (MH "Health Services Needs and Demand+")                                                                                                                                                        | Search modes - Find all my search terms | Interface - EBSCOhost<br>Research Databases Search<br>Screen - Advanced Search<br>Database - CINAHL |
| S3  | S1 OR S2                                                                                                                                                                                                                                 | Search modes - Find all my search terms | Interface - EBSCOhost<br>Research Databases Search<br>Screen - Advanced Search<br>Database - CINAHL |
| S2  | AB ( (primary OR preventative OR preventive) N5 (care OR                                                                                                                                                                                 | Search modes - Find all my search terms | Interface - EBSCOhost<br>Research Databases Search                                                  |

| #  | Query                                                                                                                                                                     | Limiters/Expanders                      | Last Run Via                                                                               |
|----|---------------------------------------------------------------------------------------------------------------------------------------------------------------------------|-----------------------------------------|--------------------------------------------------------------------------------------------|
|    | "health care" OR healthcare OR medicine OR service* ) OR TI ( (primary OR preventative OR preventive) N5 (care OR "health care" OR healthcare OR medicine OR service* ) ) |                                         | Screen - Advanced Search Database - CINAHL                                                 |
| S1 | (MH "Primary Health Care") OR (MH                                                                                                                                         | Search modes - Find all my search terms | Interface - EBSCOhost Research Databases Search Screen - Advanced Search Database - CINAHL |

### PsycINFO search strategy

| #   | Query                                                                                                                                                                                                                                                                                                | Limiters/Expanders                                                                                                                                                    | Last Run Via                                                                                     |
|-----|------------------------------------------------------------------------------------------------------------------------------------------------------------------------------------------------------------------------------------------------------------------------------------------------------|-----------------------------------------------------------------------------------------------------------------------------------------------------------------------|--------------------------------------------------------------------------------------------------|
| S14 | S9 AND S12                                                                                                                                                                                                                                                                                           | Limiters - Published Date: 20100101-; Peer Reviewed; English; Age Groups: Adulthood (18 yrs & older); Population Group: Human Search modes - Find all my search terms | Interface - EBSCOhost Research Databases Search Screen - Advanced Search Database - APA PsycInfo |
| S13 | S9 AND S12                                                                                                                                                                                                                                                                                           | Search modes - Find all my search terms                                                                                                                               | Interface - EBSCOhost Research Databases Search Screen - Advanced Search Database - APA PsycInfo |
| S12 | S10 OR S11                                                                                                                                                                                                                                                                                           | Search modes - Find all my search terms                                                                                                                               | Interface - EBSCOhost Research Databases Search Screen - Advanced Search Database - APA PsycInfo |
| S11 | AB ( ( woman* OR women* OR female* OR gender* OR mother* ) ) OR TI ( ( woman* OR women* OR female* OR gender* OR mother* ) )                                                                                                                                                                         | Search modes - Find all my search terms                                                                                                                               | Interface - EBSCOhost Research Databases Search Screen - Advanced Search Database - APA PsycInfo |
| S10 | (DE "Human Females" OR DE "Battered Females" OR DE "Daughters" OR DE "Female Criminal Offenders" OR DE "Mothers" OR DE "Sisters" OR DE "Widows" OR DE "Wives" OR DE "Working Women") OR (DE "Gender Identity" OR DE "Gender Nonconforming" OR DE "LGBTQ" OR DE "Transgender" OR DE "Transsexualism") | Search modes - Find all my search terms                                                                                                                               | Interface - EBSCOhost Research Databases Search Screen - Advanced Search Database - APA PsycInfo |
| S9  | S7 AND S8                                                                                                                                                                                                                                                                                            | Search modes - Find all my search terms                                                                                                                               | Interface - EBSCOhost Research Databases Search Screen - Advanced Search Database - APA PsycInfo |
| S8  | AB ( "united states" OR america OR usa OR u.s.a OR u.s OR "united states of america" ) OR TI ( "united states" OR america OR usa                                                                                                                                                                     | Search modes - Find all my search terms                                                                                                                               | Interface - EBSCOhost Research Databases Search Screen - Advanced Search Database - APA PsycInfo |

| #  | Query                                                                                                                                                                                                                                    | Limiters/Expanders                      | Last Run Via                                                                                              |
|----|------------------------------------------------------------------------------------------------------------------------------------------------------------------------------------------------------------------------------------------|-----------------------------------------|-----------------------------------------------------------------------------------------------------------|
|    | OR u.s.a OR u.s OR "united states of america" )                                                                                                                                                                                          |                                         |                                                                                                           |
| S7 | S3 AND S6                                                                                                                                                                                                                                | Search modes - Find all my search terms | Interface - EBSCOhost<br>Research Databases Search<br>Screen - Advanced Search<br>Database - APA PsycInfo |
| S6 | S4 OR S5                                                                                                                                                                                                                                 | Search modes - Find all my search terms | Interface - EBSCOhost<br>Research Databases Search<br>Screen - Advanced Search<br>Database - APA PsycInfo |
| S5 | AB ( (access* OR avail* OR use OR usage OR acceptance OR utili*) N5 (healthcare OR "health care" OR health-care) ) OR TI ( (access* OR avail* OR use OR usage OR acceptance OR utili*) N5 (healthcare OR "health care" OR health-care) ) | Search modes - Find all my search terms | Interface - EBSCOhost<br>Research Databases Search<br>Screen - Advanced Search<br>Database - APA PsycInfo |
| S4 | (DE "Health Care Utilization" OR DE "Utilization Reviews" OR DE "Health Care Access" OR DE "Treatment Barriers" OR DE "Health Care Seeking Behavior" OR DE "Professional Referral" OR DE "Self- Referral" OR DE "Health Service Needs")  | Search modes - Find all my search terms | Interface - EBSCOhost<br>Research Databases Search<br>Screen - Advanced Search<br>Database - APA PsycInfo |
| S3 | S1 OR S2                                                                                                                                                                                                                                 | Search modes - Find all my search terms | Interface - EBSCOhost<br>Research Databases Search<br>Screen - Advanced Search<br>Database - APA PsycInfo |
| S2 | AB ( (primary OR preventative OR preventive) N5 (care OR "health care" OR healthcare OR medicine OR service*) ) OR TI ( (primary OR preventative OR preventive) N5 (care OR "health care" OR healthcare OR medicine OR service*) )       | Search modes - Find all my search terms | Interface - EBSCOhost<br>Research Databases Search<br>Screen - Advanced Search<br>Database - APA PsycInfo |
| S1 | (DE "Primary Health Care") OR (DE "Preventive Health Services" OR DE "Prophylactic Drug Therapy")                                                                                                                                        | Search modes - Find all my search terms | Interface - EBSCOhost<br>Research Databases Search<br>Screen - Advanced Search<br>Database - APA PsycInfo |

## Web of Science search strategy

| #   | Query                                                                                                                                                                                                                                                                                                        |
|-----|--------------------------------------------------------------------------------------------------------------------------------------------------------------------------------------------------------------------------------------------------------------------------------------------------------------|
| S13 | (#10 AND #9) AND LANGUAGE: (English)<br>Refined by: PUBLICATION YEARS: ( 2021 OR 2013 OR 2020 OR 2012 OR 2019 OR 2011 OR 2018 OR 2010 OR 2017 OR 2016 OR 2015 OR 2014 )<br>Indexes=SCI-EXPANDED, SSCI Timespan=1900-2021                                                                                     |
| S12 | (#10 AND #9) AND LANGUAGE: (English)<br>Indexes=SCI-EXPANDED, SSCI Timespan=1900-2021                                                                                                                                                                                                                        |
| S11 | #10 AND #9<br>Indexes=SCI-EXPANDED, SSCI Timespan=1900-2021                                                                                                                                                                                                                                                  |
| S10 | TS=(woman* OR women* OR female* OR gender* OR mother*)<br>Indexes=SCI-EXPANDED, SSCI Timespan=1900-2021                                                                                                                                                                                                      |
| S9  | #8 AND #7<br>Indexes=SCI-EXPANDED, SSCI Timespan=1900-2021                                                                                                                                                                                                                                                   |
| S8  | TS=("united states" OR america OR usa OR u.s.a OR u.s OR "united states of america")<br>Indexes=SCI-EXPANDED, SSCI Timespan=1900-2021                                                                                                                                                                        |
| S7  | #6 AND #3<br>Indexes=SCI-EXPANDED, SSCI Timespan=1900-2021                                                                                                                                                                                                                                                   |
| S6  | #5 OR #4<br>Indexes=SCI-EXPANDED, SSCI Timespan=1900-2021                                                                                                                                                                                                                                                    |
| S5  | AB=((access* OR avail* OR use OR usage OR acceptance OR utili*) NEAR/5 (healthcare OR "health care" OR health-care)) OR TI=((access* OR avail* OR use OR usage OR acceptance OR utili*) NEAR/5 (healthcare OR "health care" OR health-care))<br>Indexes=SCI-EXPANDED, SSCI Timespan=1900-2021                |
| S4  | TS=("health service access" OR "health service need" OR "health service demand" OR "health service utilization" OR "health service utilisation" OR "health need" OR "health care need" OR "healthcare need" OR "health care demand" OR "healthcare demand")<br>Indexes=SCI-EXPANDED, SSCI Timespan=1900-2021 |
| S3  | #2 OR #1<br>Indexes=SCI-EXPANDED, SSCI Timespan=1900-2021                                                                                                                                                                                                                                                    |
| S2  | AB=( (primary OR preventative OR preventive) NEAR/5 (care OR "health care" OR healthcare OR medicine OR service* ) ) OR TI=((primary OR preventative OR preventive) NEAR/5 (care OR "health care" OR healthcare OR medicine OR service* ) )<br>Indexes=SCI-EXPANDED, SSCI Timespan=1900-2021                 |
| S1  | TS=("primary care" OR "primary health care" OR "preventive medicine" OR "preventive services" OR "preventive health services" OR "women's health" OR "womens health")<br>Indexes=SCI-EXPANDED, SSCI Timespan=1900-2021                                                                                       |

### Note

Database searches of MEDLINE, CINAHL, PsycINFO, and Web of Science were conducted on 25 and 26 January 2021. An updated search in MEDLINE, CINAHL, PsycINFO and Web of Science using the same search strategies was conducted on 10 October 2023.
