# Supplementary material for: Factors affecting women’s access to primary care in the United States since the Affordable Care Act: A mixed-methods systematic review
Source: PubMed Central journal article supplement (PMC11658587; doi:10.1371/journal.pone.0314620), 2024-12-19
Supplement: pone.0314620.s006.pdf [file pone.0314620.s006.pdf]

S2 Table. Determinants of access and utilization of healthcare services for working-age women.

| Andersen's domains              |                      | Measures of potential access                                                                                                                                                                                                                                                                                                                                                                                                                                                                                                                     |                                                                                                                                                                                                                                                                                                                                                                                                                                                                             |                                                                                                                                                                                                                                                                                                                                                                                                                                                                             | Measures of realized access                                                                                                                                                                                                                                                                                                                                                                                             |                                                                                           |                                                                                                                                                                                                                                                                                |                                                     |                                                                                                                                                                                                                                                                           |
|---------------------------------|----------------------|--------------------------------------------------------------------------------------------------------------------------------------------------------------------------------------------------------------------------------------------------------------------------------------------------------------------------------------------------------------------------------------------------------------------------------------------------------------------------------------------------------------------------------------------------|-----------------------------------------------------------------------------------------------------------------------------------------------------------------------------------------------------------------------------------------------------------------------------------------------------------------------------------------------------------------------------------------------------------------------------------------------------------------------------|-----------------------------------------------------------------------------------------------------------------------------------------------------------------------------------------------------------------------------------------------------------------------------------------------------------------------------------------------------------------------------------------------------------------------------------------------------------------------------|-------------------------------------------------------------------------------------------------------------------------------------------------------------------------------------------------------------------------------------------------------------------------------------------------------------------------------------------------------------------------------------------------------------------------|-------------------------------------------------------------------------------------------|--------------------------------------------------------------------------------------------------------------------------------------------------------------------------------------------------------------------------------------------------------------------------------|-----------------------------------------------------|---------------------------------------------------------------------------------------------------------------------------------------------------------------------------------------------------------------------------------------------------------------------------|
| Type                            | Determinants/factors | Insurance coverage/type                                                                                                                                                                                                                                                                                                                                                                                                                                                                                                                          | Usual source of care/regular primary care provider                                                                                                                                                                                                                                                                                                                                                                                                                          | Barriers to care, delayed, foregone care, unmet need                                                                                                                                                                                                                                                                                                                                                                                                                        | Utilization (use/non-use or frequency of use)                                                                                                                                                                                                                                                                                                                                                                           | Preventive health visits (annual physical exam/routine checkup in last year)              | Preventive health screening (blood pressure)                                                                                                                                                                                                                                   | Preventive health screening (cholesterol screening) | Preventive health screening (Influenza shot)                                                                                                                                                                                                                              |
| Individual Predisposing factors | Age                  | <p><b>Chen (2020)</b><br/><u>Gained Medicaid Coverage in 2014 in Expansion States (N=149)</u><br/><b>Uninsured in 2013:</b><br/>NS (18-23 years);<br/>NS (24-33 years);<br/>[Ref = 34-44 years].</p> <p><b>Jones &amp; Sonfield (2016),</b><br/><u>Post Medicaid Expansion</u><br/><b>Uninsured:</b><br/>OR = 1.58, 95% CI [1.17–2.12], p = 0.003, (25-29 years);<br/>OR = 1.54, 95% CI [1.09–2.18], p = 0.014 (30-34 years);<br/>OR = 1.47, 95% CI [1.04–2.09], p = 0.031, (35-39 years)<br/>(Ref - 18-24 years).</p> <p><b>Lee (2018),</b></p> | <p><b>Ahad (2019),</b><br/>Regular healthcare provider:<br/>OR = .35, 95% CI [.14-.89], p &lt; .05 (18-39 years).<br/><b>Early (2018)</b><br/><b>Usual source of healthcare</b><br/><b>(Adjusted Prevalence Ratios)</b><br/>NS (26-29);<br/>NS (30-34);<br/>aPR = 1.10 [95% CI [1.01, 1.21] (35-39);<br/>aPR = 1.12 [95% CI [1.02, 1.22] (40-44);<br/>(Ref = 18-25).</p> <p><b>Early (2018)</b><br/><b>Post-Medicaid Expansion</b><br/><b>Has Usual Source of Care:</b></p> | <p><b>SteelFisher (2019),</b><br/><u>Avoided doctor due to discrimination concerns:</u><br/>NS (30-49 years);<br/>NS ( 50-64 years)<br/>(Ref = 18-29 years).</p> <p><b>Early (2018)</b><br/><b>Able to obtain timely medical care</b><br/><b>(Adjusted Prevalence Ratios)</b><br/>NS (26-29);<br/>NS (30-34);<br/>aPR = 0.86 [95% CI [0.78, 0.95] (35-39)<br/>aPR = 0.83 [95% CI [0.75, 0.91] (40-44)<br/>(Ref = 18-25);<br/><b>Able to obtain needed prescriptions</b></p> | <p><b>Lee (2020),</b><br/><b>Family physician visits (past year):</b><br/>0.3%, 95% CI [0.2, 0.4], p &lt; .001;<br/><b>NP/PA visits (past year):</b><br/>NS.<br/><b>Seo (2019),</b><br/><b>Doctors visit in the past year:</b><br/>NS (All women, 40–64);<br/>NS (native-born, non-Hispanic White American (NBWA) women, 40–64);<br/>NS (Foreign-born Asian immigrant (FBAI) women, 40–64)<br/>(Ref = 18-39 years).</p> | <p><b>DiPietro Mager (2021),</b><br/><b>Routine check-up past year:</b><br/>NS (age).</p> | <p><b>Pazol (2017),</b><br/><b>BP checked by healthcare professional in past year:</b><br/>76.3%, 95% CI [69.6–81.9] (18-19 years);<br/>77.5%, 95% CI [74.2–80.5] (20–24 years);<br/>82.0%, 95% CI [80.2–83.6] (25–34 years);<br/>82.9%, 95% CI [81.1–84.5] (35–44 years).</p> |                                                     | <p><b>Pazol (2017),</b><br/><b>Received influenza vaccine in past year:</b><br/>25.1 %, 95% CI [19.6–31.4] (18-19 years.);<br/>24.1 %, 95% CI [21.2–27.3] (20–24 years.);<br/>33.0 %, 95% CI [31.1–35.0] (25–34 years.);<br/>35.9%, 95% CI [33.8–38.1] (35–44 years).</p> |

| Andersen's domains |                      | Measures of potential access                                                                                                                                                                                                                                                                                                                                                                                                                                                                                                                                                                                                 |                                                                                                                                                                                                                                                                           |                                                                                                                                                                                                                                                                                                                                                                                                                                                                                                       | Measures of realized access                   |                                                                              |                                              |                                                     |                                              |
|--------------------|----------------------|------------------------------------------------------------------------------------------------------------------------------------------------------------------------------------------------------------------------------------------------------------------------------------------------------------------------------------------------------------------------------------------------------------------------------------------------------------------------------------------------------------------------------------------------------------------------------------------------------------------------------|---------------------------------------------------------------------------------------------------------------------------------------------------------------------------------------------------------------------------------------------------------------------------|-------------------------------------------------------------------------------------------------------------------------------------------------------------------------------------------------------------------------------------------------------------------------------------------------------------------------------------------------------------------------------------------------------------------------------------------------------------------------------------------------------|-----------------------------------------------|------------------------------------------------------------------------------|----------------------------------------------|-----------------------------------------------------|----------------------------------------------|
| Type               | Determinants/factors | Insurance coverage/type                                                                                                                                                                                                                                                                                                                                                                                                                                                                                                                                                                                                      | Usual source of care/regular primary care provider                                                                                                                                                                                                                        | Barriers to care, delayed, foregone care, unmet need                                                                                                                                                                                                                                                                                                                                                                                                                                                  | Utilization (use/non-use or frequency of use) | Preventive health visits (annual physical exam/routine checkup in last year) | Preventive health screening (blood pressure) | Preventive health screening (cholesterol screening) | Preventive health screening (Influenza shot) |
|                    |                      | <u>Post Medicaid Expansion</u><br><u>(Difference in percentage-point change between FPL groups).</u><br><b>Uninsured:</b><br><b>≤ 138% FPL</b><br>-13.78%, 95% CI [-15.78, -11.77] (19-34 years);<br>-14.03%, 95% CI [-17.08, -10.98] (35-44 years);<br>-17.68%, 95% CI [-20.53, -14.84] (45-54 years);<br>-12.88%, 95% CI [-15.81, -9.95] (55-64 years).<br><b>139-399% FPL</b><br>-9.57%, 95% CI [-11.08, -8.06] (19-34 years);<br>-7.16%, 95% CI [-9.04, -5.29] (35-44 years);<br>-10.06%, 95% CI [-11.61, -8.51] (45-54 years);<br>-7.71%, 95% CI [-9.42, -5.99] (55-64 years).<br><u>Difference in percentage-point</u> | <b>(Adjusted Prevalence Ratios)</b><br><b>Age 18-34 years (n=2,895)</b><br>NS (2014);<br>NS (2015);<br>NS (2016);<br>(Ref = 2013);<br><b>Age 35-44 years (n=1,672)</b><br>NS (2014);<br>NS (2015);<br>NS (2016);<br>(Ref = 2013);<br>P for interaction (year*age) = 0.05. | <b>(Adjusted Prevalence Ratios)</b><br>NS (26-29);<br>aPR = 0.92 [95% CI [0.86, 0.99] (30-34);<br>aPR = 0.91 [95% CI [0.84, 0.99] (35-39)<br>aPR = 0.86 [95% CI [0.79, 0.93] (40-44)<br>(Ref = 18-25).<br><b>Early (2018)</b><br><b>Post-Medicaid Expansion</b><br><b>Able to obtain timely medical care:</b><br><b>(Adjusted Prevalence Ratios)</b><br><b>Age 18-34 years (n=2,895)</b><br>NS (2014);<br>NS (2015);<br>NS (2016);<br>(Ref = 2013);<br><b>Age 35-44 years (n=1,672)</b><br>NS (2014); |                                               |                                                                              |                                              |                                                     |                                              |

| Andersen's domains |                      | Measures of potential access                                                                                                                                                                                                                                                                                                                                                                                                                                                                                                                                                                                                                                        |                                                    |                                                                                                                                                                                                                                                                                                                                                                                                                                                              | Measures of realized access                   |                                                                              |                                              |                                                     |                                              |
|--------------------|----------------------|---------------------------------------------------------------------------------------------------------------------------------------------------------------------------------------------------------------------------------------------------------------------------------------------------------------------------------------------------------------------------------------------------------------------------------------------------------------------------------------------------------------------------------------------------------------------------------------------------------------------------------------------------------------------|----------------------------------------------------|--------------------------------------------------------------------------------------------------------------------------------------------------------------------------------------------------------------------------------------------------------------------------------------------------------------------------------------------------------------------------------------------------------------------------------------------------------------|-----------------------------------------------|------------------------------------------------------------------------------|----------------------------------------------|-----------------------------------------------------|----------------------------------------------|
| Type               | Determinants/factors | Insurance coverage/type                                                                                                                                                                                                                                                                                                                                                                                                                                                                                                                                                                                                                                             | Usual source of care/regular primary care provider | Barriers to care, delayed, foregone care, unmet need                                                                                                                                                                                                                                                                                                                                                                                                         | Utilization (use/non-use or frequency of use) | Preventive health visits (annual physical exam/routine checkup in last year) | Preventive health screening (blood pressure) | Preventive health screening (cholesterol screening) | Preventive health screening (Influenza shot) |
|                    |                      | <p><b>change between FPL groups</b></p> <p>≤ 138% FPL vs. 139–399% FPL</p> <p>–4.21%, 95% CI [–6.87, –1.54] (19–34 years);</p> <p>–6.87%, 95% CI [–10.44, –3.30] (35–44 years);</p> <p>–7.62%, 95% CI [–10.95, –4.3] (45–54 years);</p> <p>–5.18%, 95% CI [–8.53, –1.82] (55–64 years).</p> <p><b>Wehby (2018), Post Medicaid Expansion (2014–2015)</b></p> <p><b>Medicaid Insurance:</b></p> <p>6.9%, p &lt; .01 (19–35 years);</p> <p>6.5%, p &lt; .01 (36–55 years);</p> <p>5.5%, p &lt; .01 (55–64 years);</p> <p><b>Uninsured:</b></p> <p>–4.9%, p &lt; .01 (19–35 years);</p> <p>–4.8%, p &lt; .01 (36–55 years);</p> <p>–4.0%, p &lt; .01 (55–64 years);</p> |                                                    | <p>NS (2015);</p> <p>NS (2016);</p> <p>(Ref = 2013);</p> <p>P for interaction (year*age) NS</p> <p><b>Able to obtain needed prescriptions: (Adjusted Prevalence Ratios)</b></p> <p><b>Age 18–34 years (n=2,895)</b></p> <p>NS (2014);</p> <p>NS (2015);</p> <p>NS (2016);</p> <p>(Ref = 2013);</p> <p><b>Age 35–44 years (n=1,672)</b></p> <p>NS (2014);</p> <p>NS (2015);</p> <p>NS (2016);</p> <p>(Ref = 2013);</p> <p>P for interaction (year*age) NS</p> |                                               |                                                                              |                                              |                                                     |                                              |

| Andersen's domains |                         | Measures of potential access                                                                                                                                                                                                                                                                                                                                                                                      |                                                                                                                                                                                       |                                                                                                                                                                                       | Measures of realized access                                                                                                                        |                                                                                                                                                                              |                                              |                                                                                                                                                       |                                              |
|--------------------|-------------------------|-------------------------------------------------------------------------------------------------------------------------------------------------------------------------------------------------------------------------------------------------------------------------------------------------------------------------------------------------------------------------------------------------------------------|---------------------------------------------------------------------------------------------------------------------------------------------------------------------------------------|---------------------------------------------------------------------------------------------------------------------------------------------------------------------------------------|----------------------------------------------------------------------------------------------------------------------------------------------------|------------------------------------------------------------------------------------------------------------------------------------------------------------------------------|----------------------------------------------|-------------------------------------------------------------------------------------------------------------------------------------------------------|----------------------------------------------|
| Type               | Determinants/factors    | Insurance coverage/type                                                                                                                                                                                                                                                                                                                                                                                           | Usual source of care/regular primary care provider                                                                                                                                    | Barriers to care, delayed, foregone care, unmet need                                                                                                                                  | Utilization (use/non-use or frequency of use)                                                                                                      | Preventive health visits (annual physical exam/routine checkup in last year)                                                                                                 | Preventive health screening (blood pressure) | Preventive health screening (cholesterol screening)                                                                                                   | Preventive health screening (Influenza shot) |
|                    |                         | <p><b>Individually Purchased Coverage:</b><br/>NS (19 - 35 years);<br/>-1.3%, p &lt; .05 (36 - 55 years);<br/>-1.8%, p &lt; .05 (55 - 64 years).</p> <p><b>Employer-Sponsored Coverage:</b><br/>-1.4%, p &lt; .05 (36 - 55 years);<br/>NS (36 - 55 years);<br/>NS (55 - 64 years);</p> <p><b>Any Private Coverage:</b><br/>-2.0%, p &lt; .01 (19 - 35 years);<br/>NS (36 - 55 years);<br/>NS (55 - 64 years).</p> |                                                                                                                                                                                       |                                                                                                                                                                                       |                                                                                                                                                    |                                                                                                                                                                              |                                              |                                                                                                                                                       |                                              |
|                    | Children/has dependents | <p><b>Johnston (2018), Post Medicaid Expansion Uninsured:</b><br/>-10.1%, p &lt; .05 (Women with Dependent Children &lt; 100% FPL); -27.4%, p &lt; .001 (Women without Dependent Children &lt; 100% FPL).</p>                                                                                                                                                                                                     | <p><b>Ahad (2019), Regular healthcare provider:</b><br/>OR = 1.47, 95% CI [1.08-2.01], p &lt; .05 (Children &lt; 18 years).</p> <p><b>Early (2018) Usual source of healthcare</b></p> | <p><b>Early (2018) Able to obtain timely medical care:</b><br/><b>(Adjusted Prevalence Ratios)</b><br/>aPR = 0.91 [95% CI [0.85, 0.98] (Without children); (Ref = With children);</p> | <p><b>Johnston (2018), Post-Medicaid Expansion Primary care visits in the last year:</b><br/>NS (Women with Dependent Children &lt; 100% FPL);</p> | <p><b>DiPietro Mager (2021), Routine check-up past year:</b><br/>NS (One or more children) (Ref = no children);</p> <p><b>Margerison (2020), Post Medicaid Expansion</b></p> |                                              | <p><b>Margerison (2020), Post Medicaid Expansion Cholesterol check-in last year:</b><br/>NS (Dependent children);<br/>NS (No dependent children).</p> |                                              |

| Andersen's domains |                      | Measures of potential access                                                                                                                                                                                                                            |                                                                                                                                                                                                                                                                                                                                                                                         |                                                                                                                                                                                                                                                                                                                                                                                                                                                                                                                                                                                    | Measures of realized access                                 |                                                                                                                                                                                          |                                              |                                                     |                                              |
|--------------------|----------------------|---------------------------------------------------------------------------------------------------------------------------------------------------------------------------------------------------------------------------------------------------------|-----------------------------------------------------------------------------------------------------------------------------------------------------------------------------------------------------------------------------------------------------------------------------------------------------------------------------------------------------------------------------------------|------------------------------------------------------------------------------------------------------------------------------------------------------------------------------------------------------------------------------------------------------------------------------------------------------------------------------------------------------------------------------------------------------------------------------------------------------------------------------------------------------------------------------------------------------------------------------------|-------------------------------------------------------------|------------------------------------------------------------------------------------------------------------------------------------------------------------------------------------------|----------------------------------------------|-----------------------------------------------------|----------------------------------------------|
| Type               | Determinants/factors | Insurance coverage/type                                                                                                                                                                                                                                 | Usual source of care/regular primary care provider                                                                                                                                                                                                                                                                                                                                      | Barriers to care, delayed, foregone care, unmet need                                                                                                                                                                                                                                                                                                                                                                                                                                                                                                                               | Utilization (use/non-use or frequency of use)               | Preventive health visits (annual physical exam/routine checkup in last year)                                                                                                             | Preventive health screening (blood pressure) | Preventive health screening (cholesterol screening) | Preventive health screening (Influenza shot) |
|                    |                      | <p><b>Margerison (2020), <u>Post-Medicaid Expansion</u></b><br/> <b>Has health coverage:</b><br/>           7.6%, 95% CI [0.8, 14.4], p &lt;.05 (Dependent children);<br/>           13.9%, 95% CI [8.7, 19.2], p &lt;.05, (No dependent children).</p> | <p><b>(Adjusted Prevalence Ratios)</b><br/>           aPR = 0.91 [95% CI [0.85, 0.98] (Without children); (Ref = With children).</p> <p><b>Johnston (2018), <u>Post-Medicaid Expansion</u></b><br/> <b>No personal doctor:</b><br/>           NS (Women with Dependent Children &lt; 100% FPL);<br/>           -13.3%, p &lt; .01 (Women without Dependent Children &lt; 100% FPL).</p> | <p><b>Able to obtain needed prescriptions: (Adjusted Prevalence Ratios)</b><br/>           aPR = 0.92 [95% CI [0.86, 0.98] (Without children); (Ref = With children).</p> <p><b>Johnston (2018), <u>Post-Medicaid Expansion</u></b><br/> <b>Needed but could not see a doctor due to cost:</b><br/>           NS (Women with Dependent Children &lt; 100% FPL);<br/>           NS (Women without Dependent Children &lt; 100% FPL);</p> <p><b>Margerison (2020), <u>Post-Medicaid Expansion</u></b><br/> <b>Avoided seeking care due to cost:</b><br/>           -6.7%, 95% CI</p> | <p>NS (Women without Dependent Children &lt; 100% FPL).</p> | <p><b>Check-up in last year:</b><br/>           4.6%, 95% CI [1.3, 7.9], p &lt;.05 (Dependent children);<br/>           7.2%, 95% CI [2.5, 11.9], p &lt;.05 (No dependent children).</p> |                                              |                                                     |                                              |

| Andersen's domains |                      | Measures of potential access                                                                                                                                                                                                                                                                                                                                                                                                                                       |                                                                                                                                                                                                                                                                                                                                                                                 |                                                                                                                                                                                                                                                                                                                                                                                                | Measures of realized access                                                                                                                                                                                                                                                                                                                                                                   |                                                                                                                                            |                                              |                                                     |                                              |
|--------------------|----------------------|--------------------------------------------------------------------------------------------------------------------------------------------------------------------------------------------------------------------------------------------------------------------------------------------------------------------------------------------------------------------------------------------------------------------------------------------------------------------|---------------------------------------------------------------------------------------------------------------------------------------------------------------------------------------------------------------------------------------------------------------------------------------------------------------------------------------------------------------------------------|------------------------------------------------------------------------------------------------------------------------------------------------------------------------------------------------------------------------------------------------------------------------------------------------------------------------------------------------------------------------------------------------|-----------------------------------------------------------------------------------------------------------------------------------------------------------------------------------------------------------------------------------------------------------------------------------------------------------------------------------------------------------------------------------------------|--------------------------------------------------------------------------------------------------------------------------------------------|----------------------------------------------|-----------------------------------------------------|----------------------------------------------|
| Type               | Determinants/factors | Insurance coverage/type                                                                                                                                                                                                                                                                                                                                                                                                                                            | Usual source of care/regular primary care provider                                                                                                                                                                                                                                                                                                                              | Barriers to care, delayed, foregone care, unmet need                                                                                                                                                                                                                                                                                                                                           | Utilization (use/non-use or frequency of use)                                                                                                                                                                                                                                                                                                                                                 | Preventive health visits (annual physical exam/routine checkup in last year)                                                               | Preventive health screening (blood pressure) | Preventive health screening (cholesterol screening) | Preventive health screening (Influenza shot) |
|                    |                      |                                                                                                                                                                                                                                                                                                                                                                                                                                                                    |                                                                                                                                                                                                                                                                                                                                                                                 | [-11.9, -1.5], p <.05 (Dependent children);<br>-10.5%, 95% CI<br>[-16.2, -4.8], p <.05 (No dependent children).                                                                                                                                                                                                                                                                                |                                                                                                                                                                                                                                                                                                                                                                                               |                                                                                                                                            |                                              |                                                     |                                              |
|                    | Education            | <p><b>Chen (2020)</b><br/><u>Gained Medicaid Coverage in 2014 in Expansion States (N=149)</u><br/><b>Uninsured in 2013:</b><br/>NS (High school degree);<br/>NS (Some college);<br/>NS (College degree)<br/>(Ref = Less than High School).</p> <p><b>Jones &amp; Sonfield (2016), Post Medicaid Expansion</b><br/><b>Uninsured:</b><br/>NS (High School);<br/>OR = 0.49, 95% CI [0.34-0.71], p &lt; .001, (Some college);<br/>OR = 0.22, 95% CI [0.14-0.33], p</p> | <p><b>Ahad (2019), Regular healthcare provider:</b><br/>OR = 3.92, 95% CI [1.35-2.70], p &lt; .05 (&gt; High school education).</p> <p><b>Early (2018) Usual source of healthcare (Adjusted Prevalence Ratios)</b><br/>NS (High School graduate);<br/>aPR = 1.12 [95% CI [1.02, 1.22]](Some college);<br/>NS (College graduate or more);<br/>(Ref = Less than high school).</p> | <p><b>Early (2018) Able to obtain timely medical care: (Adjusted Prevalence Ratios)</b><br/>aPR = 0.90 [95% CI [0.85, 0.96] (High School graduate);<br/>aPR = 0.86 [95% CI [0.80, 0.92] (Some college);<br/>aPR = 0.86 [95% CI [0.78, 0.94] (College graduate or more);<br/>(Ref = Less than high school);</p> <p><b>Able to obtain needed prescriptions: (Adjusted Prevalence Ratios)</b></p> | <p><b>Farietta (2018), Post Medicaid Expansion</b><br/><b>Physician in the past year:</b><br/>NS (High School);<br/>NS (Some college or associates degree); NS (Bachelor's degree or higher)<br/>(Ref = Less than high school).</p> <p><b>Lee (2020), Family physician visits (past year):</b><br/>-2.3%, 95% CI [-4.2, -0.4], p = .020 (High School);<br/>NS (Bachelors/graduate degree)</p> | <p><b>DiPietro Mager (2021), Routine check-up past year:</b><br/>NS (College graduate or &gt;)<br/>(Ref = less than a college degree).</p> |                                              |                                                     |                                              |

| Andersen's domains |                      | Measures of potential access                                   |                                                                                                                                                                                                                    |                                                                                                                                                                                                                                                                                                                                                                                                                                                                                                                                                            | Measures of realized access                                                                                                                                                                                                                                                                                                                                                                                                                                                                                        |                                                                              |                                              |                                                     |                                              |
|--------------------|----------------------|----------------------------------------------------------------|--------------------------------------------------------------------------------------------------------------------------------------------------------------------------------------------------------------------|------------------------------------------------------------------------------------------------------------------------------------------------------------------------------------------------------------------------------------------------------------------------------------------------------------------------------------------------------------------------------------------------------------------------------------------------------------------------------------------------------------------------------------------------------------|--------------------------------------------------------------------------------------------------------------------------------------------------------------------------------------------------------------------------------------------------------------------------------------------------------------------------------------------------------------------------------------------------------------------------------------------------------------------------------------------------------------------|------------------------------------------------------------------------------|----------------------------------------------|-----------------------------------------------------|----------------------------------------------|
| Type               | Determinants/factors | Insurance coverage/type                                        | Usual source of care/regular primary care provider                                                                                                                                                                 | Barriers to care, delayed, foregone care, unmet need                                                                                                                                                                                                                                                                                                                                                                                                                                                                                                       | Utilization (use/non-use or frequency of use)                                                                                                                                                                                                                                                                                                                                                                                                                                                                      | Preventive health visits (annual physical exam/routine checkup in last year) | Preventive health screening (blood pressure) | Preventive health screening (cholesterol screening) | Preventive health screening (Influenza shot) |
|                    |                      | < .001 (Bachelors or higher)<br>(Ref - Less than high school). | <b>Farietta (2018), Post Medicaid Expansion</b><br><b>Usual source of care:</b> NS (High School);<br>NS (Some college or associates degree);<br>NS (Bachelor's degree or higher)<br>(Ref = Less than high school). | NS (High School graduate);<br>NS (Some college);<br>NS (College graduate or more);<br>(Ref = Less than high school).<br><b>Farietta (2018)</b><br><b>Post Medicaid Expansion</b><br><b>Unmet healthcare need, mental health:</b><br>OR = 0.51, 95% CI [0.29, 0.93], p < .05 (High school);<br>NS (Some college, associate degree);<br>OR = 0.35, 95% CI [0.17, 0.72], p < .01 (Bachelors or higher)<br>(Ref = Less than high school);<br><b>Unmet healthcare need, prescription drugs:</b><br>NS (High School);<br>NS (Some college or associates degree); | (Ref = Less than High School);<br><b>NP/PA visits (past year):</b><br>NS (High School);<br>4.3%, 95% CI [2.7, 5.9], p < .001<br>(Bachelors/graduate)<br>(Ref = Less than High School).<br><b>Seo (2019), Doctors visits in the past year:</b><br>OR = 2.351, 95% CI [1.25, 4.42], p < 0.001<br>(All women, High school graduate or GED);<br>OR = 2.916, 95% CI [1.13, 7.50], p = .030<br>(NBWA, High school graduate or GED);<br>OR = 2.589, 95% CI [1.02, 6.57], p = .050<br>(FBAI, High school graduate or GED); |                                                                              |                                              |                                                     |                                              |

| Andersen's domains |                          | Measures of potential access                                                                                                                                                                                 |                                                                                                                                                                                                                          |                                                                                                                                                                                                                                                                                                                                 | Measures of realized access                                                                                                                                                                                                                                                                                                                                         |                                                                                                                                   |                                              |                                                     |                                              |
|--------------------|--------------------------|--------------------------------------------------------------------------------------------------------------------------------------------------------------------------------------------------------------|--------------------------------------------------------------------------------------------------------------------------------------------------------------------------------------------------------------------------|---------------------------------------------------------------------------------------------------------------------------------------------------------------------------------------------------------------------------------------------------------------------------------------------------------------------------------|---------------------------------------------------------------------------------------------------------------------------------------------------------------------------------------------------------------------------------------------------------------------------------------------------------------------------------------------------------------------|-----------------------------------------------------------------------------------------------------------------------------------|----------------------------------------------|-----------------------------------------------------|----------------------------------------------|
| Type               | Determinants/factors     | Insurance coverage/type                                                                                                                                                                                      | Usual source of care/regular primary care provider                                                                                                                                                                       | Barriers to care, delayed, foregone care, unmet need                                                                                                                                                                                                                                                                            | Utilization (use/non-use or frequency of use)                                                                                                                                                                                                                                                                                                                       | Preventive health visits (annual physical exam/routine checkup in last year)                                                      | Preventive health screening (blood pressure) | Preventive health screening (cholesterol screening) | Preventive health screening (Influenza shot) |
|                    |                          |                                                                                                                                                                                                              |                                                                                                                                                                                                                          | NS (Bachelor's degree or higher) (Ref = Less than high school).<br><b>SteelFisher (2019),</b><br><b>Avoided doctor due to discrimination concerns:</b><br>OR = 2.38, p < .05, 95% CI [1.00, 5.63] (College+)<br>(Ref < College).                                                                                                | NS (All women, Bachelor and above);<br>NS (NBWA, Bachelor and above);<br>NS (FBAI, Bachelor and above)<br>(Ref = less than high school).                                                                                                                                                                                                                            |                                                                                                                                   |                                              |                                                     |                                              |
|                    | <b>Employment status</b> | <b>Jones &amp; Sonfield (2016),</b><br><b><u>Post Medicaid Expansion</u></b><br><b>Uninsured:</b><br>NS (1-34 hours);<br>OR = 0.57, 95% CI [0.43-0.76], p < .001 (35 hours or more)<br>(Ref - Not employed). | <b>Ahad (2019),</b><br><b>Regular healthcare provider:</b><br>NS (Employed).<br><b>Farietta (2018),</b><br><b><u>Post Medicaid Expansion</u></b><br><b>Usual source of care:</b><br>NS (Working)<br>(Ref = Not working). | <b>Farietta (2018),</b><br><b><u>Post Medicaid Expansion</u></b><br><b>Unmet healthcare need, mental health:</b><br>OR = 0.65, 95% CI [0.44, 0.97], p < .05 (Working)<br>(Ref = Not working).<br><b>Unmet healthcare need, prescription drugs:</b><br>OR = 0.73, 95% CI [0.54, 0.98], p < .05 (Working)<br>(Ref = Not working). | <b>Farietta (2018),</b><br><b><u>Post Medicaid Expansion</u></b><br><b>Physician in the past year:</b><br>NS (Working)<br>(Ref = Not working).<br><b>Lee (2020),</b><br><b>Family physician visits (past year):</b><br>NS (Employed);<br><b>NP/PA visits (past year):</b><br>NS (Employed).<br><b>Seo (2019),</b><br><b><u>Doctors visits in the past year:</u></b> | <b>DiPietro Mager (2021),</b><br><b>Routine check-up past year:</b><br>NS (Not currently employed)<br>(Ref = Currently employed). |                                              |                                                     |                                              |



| Andersen's domains |                      | Measures of potential access |                                                    |                                                      | Measures of realized access                                                                                                                                                                                                                                        |                                                                              |                                              |                                                     |                                              |
|--------------------|----------------------|------------------------------|----------------------------------------------------|------------------------------------------------------|--------------------------------------------------------------------------------------------------------------------------------------------------------------------------------------------------------------------------------------------------------------------|------------------------------------------------------------------------------|----------------------------------------------|-----------------------------------------------------|----------------------------------------------|
| Type               | Determinants/factors | Insurance coverage/type      | Usual source of care/regular primary care provider | Barriers to care, delayed, foregone care, unmet need | Utilization (use/non-use or frequency of use)                                                                                                                                                                                                                      | Preventive health visits (annual physical exam/routine checkup in last year) | Preventive health screening (blood pressure) | Preventive health screening (cholesterol screening) | Preventive health screening (Influenza shot) |
|                    |                      |                              |                                                    |                                                      | NS (All women, Unemployed);<br>NS (NBWA, Unemployed);<br>NS (FBAI, Unemployed);<br>NS (All women, Self-employed or family business);<br>NS (NBWA, Self-employed or family business);<br>NS (FBAI, Self-employed or family business)<br>(Ref = Employed by others). |                                                                              |                                              |                                                     |                                              |
|                    | English proficiency  |                              |                                                    |                                                      | <b>Seo (2019), Doctors' visits in the past year:</b><br>NS (All women, Well or very well);<br>N/A (NBWA);<br>NS (FBAI, Well or very well)<br>(Ref = not well or not at all).                                                                                       |                                                                              |                                              |                                                     |                                              |

| Andersen's domains |                                           | Measures of potential access                                                                                                                                                                                                        |                                                                                                                                                                                                                                         |                                                                                                                                                                                                                                                                                                                                                                                                  | Measures of realized access                        |                                                                                                                                                                                                          |                                              |                                                     |                                                                                                                                                                                                                                         |
|--------------------|-------------------------------------------|-------------------------------------------------------------------------------------------------------------------------------------------------------------------------------------------------------------------------------------|-----------------------------------------------------------------------------------------------------------------------------------------------------------------------------------------------------------------------------------------|--------------------------------------------------------------------------------------------------------------------------------------------------------------------------------------------------------------------------------------------------------------------------------------------------------------------------------------------------------------------------------------------------|----------------------------------------------------|----------------------------------------------------------------------------------------------------------------------------------------------------------------------------------------------------------|----------------------------------------------|-----------------------------------------------------|-----------------------------------------------------------------------------------------------------------------------------------------------------------------------------------------------------------------------------------------|
| Type               | Determinants/factors                      | Insurance coverage/type                                                                                                                                                                                                             | Usual source of care/regular primary care provider                                                                                                                                                                                      | Barriers to care, delayed, foregone care, unmet need                                                                                                                                                                                                                                                                                                                                             | Utilization (use/non-use or frequency of use)      | Preventive health visits (annual physical exam/routine checkup in last year)                                                                                                                             | Preventive health screening (blood pressure) | Preventive health screening (cholesterol screening) | Preventive health screening (Influenza shot)                                                                                                                                                                                            |
|                    | Gender identity and/or sexual orientation | <p><b>Dai (2019), No healthcare coverage:</b></p> <p><b>Sexual orientation</b><br/>NS (Lesbian);<br/>NS (Bisexual);<br/>NS (Nonresponse group)<br/>AOR = 2.5, 95% CI [1.3, 4.6], p &lt; .05 (Other)<br/>(Ref = straight women).</p> | <p><b>Dai (2019), No personal care provider:</b></p> <p><b>Sexual orientation</b><br/>NS (Lesbian);<br/>NS (Bisexual);<br/>NS (Nonresponse group);<br/>AOR = 2.4, 95% CI [1.3, 4.4], p &lt; .05 (Other)<br/>(Ref = straight women).</p> | <p><b>Dai (2019), Could not afford a doctor because of cost (past year):</b></p> <p><b>Sexual orientation</b><br/>NS (Lesbian);<br/>NS (Bisexual);NS (Nonresponse group);<br/>NS (Other)<br/>(Ref = straight women).</p> <p><b>SteelFisher (2019), Avoided doctor due to discrimination concerns:</b></p> <p><b>Sexual orientation/Gender identity</b><br/>NS (LGBTQ)<br/>(Ref = non-LGBTQ).</p> |                                                    | <p><b>Dai (2019), Routine checkup in the past year:</b></p> <p><b>Sexual orientation</b><br/>NS (Lesbian);<br/>NS (Bisexual);<br/>NS (Nonresponse group);<br/>NS (Other)<br/>(Ref = straight women).</p> |                                              |                                                     | <p><b>Dai (2019), Flu shot in the past year:</b></p> <p><b>Sexual orientation</b><br/>AOR = 1.3, 95% CI [1.0, 1.6], p &lt; .05 (Lesbian);<br/>NS (Bisexual);<br/>NS (Nonresponse group);<br/>NS (Other)<br/>(Ref = straight women).</p> |
|                    | Health Literacy                           |                                                                                                                                                                                                                                     | <p><b>Ahad (2019), Regular healthcare provider:</b></p> <p>OR = 1.11, 95% CI [1.02-1.30], p &lt; .05 (Health Literacy Scale, range 4-20).</p>                                                                                           |                                                                                                                                                                                                                                                                                                                                                                                                  |                                                    |                                                                                                                                                                                                          |                                              |                                                     |                                                                                                                                                                                                                                         |
|                    | Citizenship status                        |                                                                                                                                                                                                                                     |                                                                                                                                                                                                                                         | <p><b>Ahad (2019), Regular</b></p>                                                                                                                                                                                                                                                                                                                                                               | <p><b>Early (2018) Post-Medicaid Expansion</b></p> | <p><b>Seo (2019), Doctors visit in past year:</b></p>                                                                                                                                                    |                                              |                                                     |                                                                                                                                                                                                                                         |

| Andersen's domains |                      | Measures of potential access |                                                                                                                                                                                                                                                                                                                                                                                                                                                                                       |                                                                                                                                                                                                                                                                                                                                                                                                                                                                           | Measures of realized access                                                                                                                                      |                                                                              |                                              |                                                     |                                              |
|--------------------|----------------------|------------------------------|---------------------------------------------------------------------------------------------------------------------------------------------------------------------------------------------------------------------------------------------------------------------------------------------------------------------------------------------------------------------------------------------------------------------------------------------------------------------------------------|---------------------------------------------------------------------------------------------------------------------------------------------------------------------------------------------------------------------------------------------------------------------------------------------------------------------------------------------------------------------------------------------------------------------------------------------------------------------------|------------------------------------------------------------------------------------------------------------------------------------------------------------------|------------------------------------------------------------------------------|----------------------------------------------|-----------------------------------------------------|----------------------------------------------|
| Type               | Determinants/factors | Insurance coverage/type      | Usual source of care/regular primary care provider                                                                                                                                                                                                                                                                                                                                                                                                                                    | Barriers to care, delayed, foregone care, unmet need                                                                                                                                                                                                                                                                                                                                                                                                                      | Utilization (use/non-use or frequency of use)                                                                                                                    | Preventive health visits (annual physical exam/routine checkup in last year) | Preventive health screening (blood pressure) | Preventive health screening (cholesterol screening) | Preventive health screening (Influenza shot) |
|                    | (immigrant status)   |                              | <p>healthcare provider:<br/>OR = .27 (OR),<br/>95% CI [.08-.91],<br/>p &lt; .05 (African immigrant).</p> <p>Early (2018)<br/>Post-Medicaid Expansion<br/>Has Usual Source of Care:<br/>(Adjusted Prevalence Ratios)<br/>US-born or naturalized citizen (n=3,164)<br/>NS (2014);<br/>NS (2015);<br/>NS (2016);<br/>(Ref = 2013);</p> <p>Non-citizen (n=1,403)<br/>NS (2014);<br/>NS (2015);<br/>NS (2016);<br/>(Ref = 2013).<br/>P for interaction (year*citizenship status) – NS.</p> | <p>Able to obtain timely medical care:<br/>(Adjusted Prevalence Ratios)<br/>US-born or naturalized citizen (n=3,164)<br/>NS (2014);<br/>NS (2015);<br/>NS (2016);<br/>(Ref = 2013);</p> <p>Non-citizen (n=1,403)<br/>NS (2014);<br/>NS (2015);<br/>NS (2016);<br/>(Ref = 2013);<br/>P for interaction (year*citizenship status) – NS;</p> <p>Able to obtain needed prescriptions:<br/>(Prevalence Ratios)<br/>US-born or naturalized citizen (n=3,164)<br/>NS (2014);</p> | <p>88.6% (NBWA);<br/>77.9% (FBAL)<br/>(At least one visit);<br/>11.4% (NBWA);<br/>22.1% (FBAL)<br/>(No visit);<br/>(comparison between groups, p &lt;0.001).</p> |                                                                              |                                              |                                                     |                                              |

| Andersen's domains |                      | Measures of potential access                                                                                                         |                                                                                                                                                                                                     |                                                                                                                                                                                           | Measures of realized access                                                                             |                                                                                                                              |                                              |                                                                                                                     |                                              |
|--------------------|----------------------|--------------------------------------------------------------------------------------------------------------------------------------|-----------------------------------------------------------------------------------------------------------------------------------------------------------------------------------------------------|-------------------------------------------------------------------------------------------------------------------------------------------------------------------------------------------|---------------------------------------------------------------------------------------------------------|------------------------------------------------------------------------------------------------------------------------------|----------------------------------------------|---------------------------------------------------------------------------------------------------------------------|----------------------------------------------|
| Type               | Determinants/factors | Insurance coverage/type                                                                                                              | Usual source of care/regular primary care provider                                                                                                                                                  | Barriers to care, delayed, foregone care, unmet need                                                                                                                                      | Utilization (use/non-use or frequency of use)                                                           | Preventive health visits (annual physical exam/routine checkup in last year)                                                 | Preventive health screening (blood pressure) | Preventive health screening (cholesterol screening)                                                                 | Preventive health screening (Influenza shot) |
|                    |                      |                                                                                                                                      |                                                                                                                                                                                                     | NS (2015);<br>NS (2016);<br>(Ref = 2013).<br><b>Non-citizen (n=1,403)</b><br>NS (2014);<br>NS (2015);<br>NS (2016);<br>(Ref = 2013).<br>P for interaction (year*citizenship status) – NS. |                                                                                                         |                                                                                                                              |                                              |                                                                                                                     |                                              |
|                    | Information sources  |                                                                                                                                      | <b>Ahad (2019), Regular healthcare provider:</b><br>OR = .32, 95% CI [.11-.89], p < .05 (respondent is the individual in the household most likely to obtain information to make health decisions). |                                                                                                                                                                                           |                                                                                                         |                                                                                                                              |                                              |                                                                                                                     |                                              |
|                    | Marital status       | <b>Chen (2020), <u>Gained Medicaid Coverage in 2014 in Expansion States (N=149)</u></b><br><b>Uninsured in 2013:</b><br>NS (Married) | <b>Ahad (2019), Regular healthcare provider:</b><br>NS (Married).                                                                                                                                   | <b>Margerison (2020), <u>Post-Medicaid Expansion</u></b><br><b>Avoided seeking care due to cost:</b><br>-8.5%, 95% CI [-14.4, -2.6], p <.05 (Married);                                    | <b>Lee (2020), Family physician visits (past year):</b><br>1.5%, 95% CI [0.1, 2.9], p = .035 (Married); | <b>DiPietro Mager (2021), Routine check-up past year:</b><br>NS (Married); (Ref = not married).<br><b>Margerison (2020),</b> |                                              | <b>Margerison (2020), <u>Post Medicaid Expansion</u></b><br><b>Cholesterol check-in last year:</b><br>NS (Married); |                                              |

| Andersen's domains |                              | Measures of potential access                                                                                                                                                                                                                                                                                                                                                                    |                                                    |                                                      | Measures of realized access                                                                                                                                                                                                                                                                              |                                                                                                                                                               |                                              |                                                     |                                              |
|--------------------|------------------------------|-------------------------------------------------------------------------------------------------------------------------------------------------------------------------------------------------------------------------------------------------------------------------------------------------------------------------------------------------------------------------------------------------|----------------------------------------------------|------------------------------------------------------|----------------------------------------------------------------------------------------------------------------------------------------------------------------------------------------------------------------------------------------------------------------------------------------------------------|---------------------------------------------------------------------------------------------------------------------------------------------------------------|----------------------------------------------|-----------------------------------------------------|----------------------------------------------|
| Type               | Determinants/factors         | Insurance coverage/type                                                                                                                                                                                                                                                                                                                                                                         | Usual source of care/regular primary care provider | Barriers to care, delayed, foregone care, unmet need | Utilization (use/non-use or frequency of use)                                                                                                                                                                                                                                                            | Preventive health visits (annual physical exam/routine checkup in last year)                                                                                  | Preventive health screening (blood pressure) | Preventive health screening (cholesterol screening) | Preventive health screening (Influenza shot) |
|                    |                              | (Ref = Not married).<br><b>Jones &amp; Sonfield (2016),</b><br><u>Post Medicaid Expansion</u><br><b>Uninsured:</b><br>OR = 0.71, 95% CI [0.55–0.92], p = .009 (married) (Ref - unmarried).<br><b>Margerison (2020),</b><br><u>Post-Medicaid Expansion</u><br><b>Has healthcare coverage:</b><br>11.9%, 95% CI [4.1, 19.7], p <.05 (Married);<br>7.6%, 95% CI [2.2, 12.9], p <.05 (Not married). |                                                    | –6.8%, 95% CI [–11.5, –2.2], p <.05 (Not married).   | <b>NP/PA visits in past year:</b><br>NS (Married).<br><b>Seo (2019),</b><br><b>Doctor visit in the past year:</b><br>NS (All women, Married or living together);<br>NS (NBWA, Married or living together);<br>NS (FBAI, Married or living together) (Ref = Widowed/separated/divorced or never married). | <u>Post Medicaid Expansion</u><br><b>Check-up last year:</b><br>6.2%, 95% CI [1.3, 11.2], p <.05 (Married);<br>4.5%, 95% CI [1.3, 7.9], p <.05 (Not married). |                                              | NS (Not married).                                   |                                              |
|                    | Number of births/Family size | <b>Jones &amp; Sonfield (2016),</b><br><u>Post Medicaid Expansion</u><br><b>Uninsured:</b><br>OR = 0.66, 95% CI [0.50, 0.89], p = .006 (1 birth);<br>OR = 0.63, 95% CI [0.47–0.86], p = .003 (2 births)                                                                                                                                                                                         |                                                    |                                                      | <b>Lee (2020),</b><br><b>Family physician visits (past year):</b><br>-0.7%, 95% CI [-1.1, -0.3], p < .001 (Family size);<br><b>NP/PA visits (past year):</b><br>-1.4%, 95% CI                                                                                                                            |                                                                                                                                                               |                                              |                                                     |                                              |

| Andersen's domains |                       | Measures of potential access                                                                                                                                                                                                                                                                                                                                                                                                                                                                                                                                                        |                                                                                                                                                                                                                                                                                                                                                                                                                                                        |                                                                                                                                                                                                                                                                                                                                                                                                                                                                            | Measures of realized access                                                                                                                                                                                                                                                                                                                                                                                                                                                                         |                                                                                                                                                                                                                                                                                                                    |                                                                                                                                                                                                                                                                                                            |                                                     |                                              |
|--------------------|-----------------------|-------------------------------------------------------------------------------------------------------------------------------------------------------------------------------------------------------------------------------------------------------------------------------------------------------------------------------------------------------------------------------------------------------------------------------------------------------------------------------------------------------------------------------------------------------------------------------------|--------------------------------------------------------------------------------------------------------------------------------------------------------------------------------------------------------------------------------------------------------------------------------------------------------------------------------------------------------------------------------------------------------------------------------------------------------|----------------------------------------------------------------------------------------------------------------------------------------------------------------------------------------------------------------------------------------------------------------------------------------------------------------------------------------------------------------------------------------------------------------------------------------------------------------------------|-----------------------------------------------------------------------------------------------------------------------------------------------------------------------------------------------------------------------------------------------------------------------------------------------------------------------------------------------------------------------------------------------------------------------------------------------------------------------------------------------------|--------------------------------------------------------------------------------------------------------------------------------------------------------------------------------------------------------------------------------------------------------------------------------------------------------------------|------------------------------------------------------------------------------------------------------------------------------------------------------------------------------------------------------------------------------------------------------------------------------------------------------------|-----------------------------------------------------|----------------------------------------------|
| Type               | Determinants/factors  | Insurance coverage/type                                                                                                                                                                                                                                                                                                                                                                                                                                                                                                                                                             | Usual source of care/regular primary care provider                                                                                                                                                                                                                                                                                                                                                                                                     | Barriers to care, delayed, foregone care, unmet need                                                                                                                                                                                                                                                                                                                                                                                                                       | Utilization (use/non-use or frequency of use)                                                                                                                                                                                                                                                                                                                                                                                                                                                       | Preventive health visits (annual physical exam/routine checkup in last year)                                                                                                                                                                                                                                       | Preventive health screening (blood pressure)                                                                                                                                                                                                                                                               | Preventive health screening (cholesterol screening) | Preventive health screening (Influenza shot) |
|                    |                       | (Ref = 0 births).                                                                                                                                                                                                                                                                                                                                                                                                                                                                                                                                                                   |                                                                                                                                                                                                                                                                                                                                                                                                                                                        |                                                                                                                                                                                                                                                                                                                                                                                                                                                                            | [-1.8, -1.1], p < .001 (Family size).                                                                                                                                                                                                                                                                                                                                                                                                                                                               |                                                                                                                                                                                                                                                                                                                    |                                                                                                                                                                                                                                                                                                            |                                                     |                                              |
|                    | Race and/or ethnicity | <p><b>Chen (2020), <u>Gained Medicaid Coverage in 2014 in Expansion States (N=149)</u></b></p> <p><b>Uninsured in 2013:</b><br/>OR = 0.14, 95% CI [0.02, 0.97], p = 0.046 (Black);<br/>OR=0.12, 95% CI [0.03, 0.49], p = 0.003 (Hispanic);<br/>NS (Other);<br/>[Ref = White].</p> <p><b>Jones &amp; Sonfield (2016), <u>Post Medicaid Expansion</u></b></p> <p><b>Uninsured:</b><br/>NS (Black, Non-Hispanic);<br/>NS (Other, Non-Hispanic);<br/>OR = 2.2, 95% CI [1.67, 2.9], p &lt; .001 (Hispanic, born in U.S.);<br/>OR = 4.57, 95% CI [3.37, 6.20], p &lt; .001 (Hispanic,</p> | <p><b>Early (2018)</b></p> <p><b>Usual source of healthcare (Adjusted Prevalence Ratios)</b><br/>NS (Latina);<br/>NS (Non-Latina Black);<br/>NS (Non-Latina Asian/PI);<br/>aPR = 1.18 [95% CI [1.06, 1.32] (Non-Latina other/Multiple) (Ref = Non-Latina White).</p> <p><b>Farietta (2018), <u>Post Medicaid Expansion</u></b></p> <p><b>Usual source of care:</b><br/>NS (Non-Hispanic black);<br/>NS<br/>(Other)<br/>(Ref = Non-Hispanic White).</p> | <p><b>Early (2018)</b></p> <p><b>Able to obtain timely medical care: (Adjusted Prevalence Ratios)</b><br/>NS (Latina);<br/>aPR = 1.11 [95% CI [1.02, 1.21] (Non-Latina Black);<br/>NS (Non-Latina Asian/PI);<br/>NS (Non-Latina other/Multiple) (Ref = Non-Latina White);</p> <p><b>Able to obtain needed prescriptions: (Adjusted Prevalence Ratios)</b><br/>NS (Latina);<br/>NS (Non-Latina Black);<br/>NS (Non-Latina Asian/PI);<br/>NS (Non-Latina other/Multiple)</p> | <p><b>Farietta (2018), <u>Post Medicaid Expansion</u></b></p> <p><b>Physician visit in the past year:</b><br/>OR = 1.54, 95% CI [1.06, 2.25], p &lt; .05 (Non-Hispanic black);<br/>NS (Other) (Ref = Non-Hispanic White).</p> <p><b>Lee (2020), <u>Family physician visits (past year):</u></b><br/>-2.5%, 95% CI [-4.1, -0.9], p = .002, (Black, Non-Hispanic);<br/>-3.1%, 95% CI [-4.8, -1.4], p &lt; .001 (Other race, Non-Hispanic);<br/>-3.4%, 95% CI [-5.2, -1.5], p &lt; .001 (Hispanic)</p> | <p><b>Pazol (2017), <u>BP checked by healthcare professional in the past year:</u></b><br/>84.9%, 95% CI [83.3–86.4] (Non-Hispanic white);<br/>82.5%, 95% CI [79.6–85.2] (Non-Hispanic black);<br/>69.4%, 95% CI [66.5–72.1] (Hispanic);<br/>78.8%, 95% CI [74.9–82.3] (Non-Hispanic other or multiple races).</p> | <p><b>Pazol (2017), <u>Received an influenza vaccine in the past year:</u></b><br/>32.8%, 95% CI [30.9–34.7] (Non-Hispanic white);<br/>28.0%, 95% CI [24.8–31.3] (Non-Hispanic black);<br/>27.6%, 95% CI [25.1–30.2] (Hispanic);<br/>39.9%, 95% CI [35.7–44.4] (Non-Hispanic other or multiple races).</p> |                                                     |                                              |

| Andersen's domains |                      | Measures of potential access                                                                                                                                                                                                                                                                                                                                                                                                                                                                                                          |                                                    |                                                                                                                                                                                                                                                                                                                                                                                                                                                                                                                                      | Measures of realized access                                                                                                                                                                                                                                                                                                                                                                                                             |                                                                              |                                              |                                                     |                                              |
|--------------------|----------------------|---------------------------------------------------------------------------------------------------------------------------------------------------------------------------------------------------------------------------------------------------------------------------------------------------------------------------------------------------------------------------------------------------------------------------------------------------------------------------------------------------------------------------------------|----------------------------------------------------|--------------------------------------------------------------------------------------------------------------------------------------------------------------------------------------------------------------------------------------------------------------------------------------------------------------------------------------------------------------------------------------------------------------------------------------------------------------------------------------------------------------------------------------|-----------------------------------------------------------------------------------------------------------------------------------------------------------------------------------------------------------------------------------------------------------------------------------------------------------------------------------------------------------------------------------------------------------------------------------------|------------------------------------------------------------------------------|----------------------------------------------|-----------------------------------------------------|----------------------------------------------|
| Type               | Determinants/factors | Insurance coverage/type                                                                                                                                                                                                                                                                                                                                                                                                                                                                                                               | Usual source of care/regular primary care provider | Barriers to care, delayed, foregone care, unmet need                                                                                                                                                                                                                                                                                                                                                                                                                                                                                 | Utilization (use/non-use or frequency of use)                                                                                                                                                                                                                                                                                                                                                                                           | Preventive health visits (annual physical exam/routine checkup in last year) | Preventive health screening (blood pressure) | Preventive health screening (cholesterol screening) | Preventive health screening (Influenza shot) |
|                    |                      | <p>not born in the U.S.)<br/>(Ref = White, Non-Hispanic).<br/><b>Lee (2018), Post Medicaid Expansion, (Difference in percentage-point change between FPL groups), Uninsured: ≤ 138% FPL</b></p> <p><b>Race</b><br/>-14.67%, 95% CI [-16.43, -12.91] (White);<br/>-13.89%, 95% CI [-16.35, -11.44] (Black);<br/>-14.21%, 95% CI [-18.67, -9.76] (Other);</p> <p><b>Ethnicity</b><br/>-15.2%, 95% CI [-16.79, -13.61] (Hispanic);<br/>-13.47%, 95% CI [-16.07, -10.86] (Non-Hispanic);<br/><b>139–399% FPL:</b></p> <p><b>Race:</b></p> |                                                    | <p>(Ref = Non-Latina White).<br/><b>Farietta (2018), Post Medicaid Expansion Unmet healthcare needs, mental health:</b><br/>NS (Non-Hispanic black);<br/>NS (Other)<br/>(Ref = Non-Hispanic White).<br/><b>Unmet healthcare needs, prescription drugs:</b><br/>NS (Non-Hispanic black);<br/>NS (Other)<br/>(Ref = Non-Hispanic White).<br/><b>SteelFisher (2019), Avoided doctor due to discrimination concerns:</b><br/>OR = 3.69, 95% CI [1.59, 8.58], p &lt; .05 (Hispanic/Latina);<br/>OR 5.97, 95% CI [2.00, 17.87], p &lt;</p> | <p>(Ref = White, Non-Hispanic);<br/><b>NP/PA visits (past year):</b><br/>-6.7%, 95% CI [-8.2, -5.1], p &lt; .001 (Black, Non-Hispanic);<br/>-6.4%, 95% CI [-7.8, -5], p &lt; .001 (Other Race, Non-Hispanic);<br/>-6.7%, 95% CI [-8.7, -4.7], p &lt; .001 (Hispanic)<br/>(Ref = White, Non-Hispanic).<br/><b>Seo (2019), Doctors visits in the past year:</b><br/>OR = 0.537, 95% CI [0.35–0.84], p = .008 (FBAI)<br/>(Ref = NBWA).</p> |                                                                              |                                              |                                                     |                                              |

| Andersen's domains |                      | Measures of potential access                                                                                                                                                                                                                                                                                                                                                                                                                                                                                                                                |                                                    |                                                                      | Measures of realized access                   |                                                                              |                                              |                                                     |                                              |  |
|--------------------|----------------------|-------------------------------------------------------------------------------------------------------------------------------------------------------------------------------------------------------------------------------------------------------------------------------------------------------------------------------------------------------------------------------------------------------------------------------------------------------------------------------------------------------------------------------------------------------------|----------------------------------------------------|----------------------------------------------------------------------|-----------------------------------------------|------------------------------------------------------------------------------|----------------------------------------------|-----------------------------------------------------|----------------------------------------------|--|
| Type               | Determinants/factors | Insurance coverage/type                                                                                                                                                                                                                                                                                                                                                                                                                                                                                                                                     | Usual source of care/regular primary care provider | Barriers to care, delayed, foregone care, unmet need                 | Utilization (use/non-use or frequency of use) | Preventive health visits (annual physical exam/routine checkup in last year) | Preventive health screening (blood pressure) | Preventive health screening (cholesterol screening) | Preventive health screening (Influenza shot) |  |
|                    |                      | -8.20%, 95% CI [-9.29, -7.12] (White);<br>-8.35%, 95% CI [-10.17, -6.52] (Black);<br>-14.16%, 95% CI [-16.64, -11.68] (Other);<br><b>Ethnicity:</b><br>-8.11%, 95% CI [-9.07, -7.15] (Hispanic);<br>-14.19%, 95% CI [-16.42, -11.96] (Non-Hispanic);<br><b><u>Difference in percentage-point change between FPL groups,</u></b><br><b>≤ 138% FPL vs. 139–399% FPL:</b><br><b>Race:</b><br>-6.47%, 95% CI [-8.57, -4.36] (White);<br>-5.55%, 95% CI [-8.56, -2.53] (Black);<br>NS (Other);<br><b>Ethnicity:</b><br>-7.09%, 95% CI [-9.02, -5.17] (Hispanic); |                                                    | 0.5 (Native American);<br>NS (Black);<br>NS (Asian)<br>(Ref =White). |                                               |                                                                              |                                              |                                                     |                                              |  |



| Andersen's domains |                      | Measures of potential access                                                                                                                                                                                                                                                                                                                                                                                                                                                                                                                                                               |                                                    |                                                      | Measures of realized access                   |                                                                              |                                              |                                                     |                                              |
|--------------------|----------------------|--------------------------------------------------------------------------------------------------------------------------------------------------------------------------------------------------------------------------------------------------------------------------------------------------------------------------------------------------------------------------------------------------------------------------------------------------------------------------------------------------------------------------------------------------------------------------------------------|----------------------------------------------------|------------------------------------------------------|-----------------------------------------------|------------------------------------------------------------------------------|----------------------------------------------|-----------------------------------------------------|----------------------------------------------|
| Type               | Determinants/factors | Insurance coverage/type                                                                                                                                                                                                                                                                                                                                                                                                                                                                                                                                                                    | Usual source of care/regular primary care provider | Barriers to care, delayed, foregone care, unmet need | Utilization (use/non-use or frequency of use) | Preventive health visits (annual physical exam/routine checkup in last year) | Preventive health screening (blood pressure) | Preventive health screening (cholesterol screening) | Preventive health screening (Influenza shot) |
|                    |                      | NS (Non-Hispanic).<br><b>Wehby (2018),<br/>           Post Medicaid<br/>           Expansion</b><br><b>Medicaid<br/>           Insurance:</b><br>5.7%, p < .01<br>(White);<br>6.6%, p < .01<br>(Black);<br>6.0%, p < .01<br>(Other);<br>7.5%, p < .01<br>(Hispanic);<br><b>Uninsured:</b><br>-3.9%, p < .01<br>(White);<br>-3.8%, p < .01<br>(Black);<br>-4.1%, p < .05<br>(Other);<br>-5.1%, p < .01<br>(Hispanic);<br><b>Individually<br/>           Purchased<br/>           Coverage:</b><br>-0.8%, p < .05<br>(White);<br>NS (Black);<br>-3.1%, p < .05<br>(Other);<br>NS (Hispanic); |                                                    |                                                      |                                               |                                                                              |                                              |                                                     |                                              |

| Andersen's domains          |                      | Measures of potential access                                                                                                                                                                                                                                                                  |                                                                                                                                                                   |                                                                                                                                                                                                                               | Measures of realized access                                                                                                                                                                                                                  |                                                                              |                                                                                                                                                                                                                                                              |                                                                                                                                                                                                                                                 |                                                                                                                                                                                                                                                                |
|-----------------------------|----------------------|-----------------------------------------------------------------------------------------------------------------------------------------------------------------------------------------------------------------------------------------------------------------------------------------------|-------------------------------------------------------------------------------------------------------------------------------------------------------------------|-------------------------------------------------------------------------------------------------------------------------------------------------------------------------------------------------------------------------------|----------------------------------------------------------------------------------------------------------------------------------------------------------------------------------------------------------------------------------------------|------------------------------------------------------------------------------|--------------------------------------------------------------------------------------------------------------------------------------------------------------------------------------------------------------------------------------------------------------|-------------------------------------------------------------------------------------------------------------------------------------------------------------------------------------------------------------------------------------------------|----------------------------------------------------------------------------------------------------------------------------------------------------------------------------------------------------------------------------------------------------------------|
| Type                        | Determinants/factors | Insurance coverage/type                                                                                                                                                                                                                                                                       | Usual source of care/regular primary care provider                                                                                                                | Barriers to care, delayed, foregone care, unmet need                                                                                                                                                                          | Utilization (use/non-use or frequency of use)                                                                                                                                                                                                | Preventive health visits (annual physical exam/routine checkup in last year) | Preventive health screening (blood pressure)                                                                                                                                                                                                                 | Preventive health screening (cholesterol screening)                                                                                                                                                                                             | Preventive health screening (Influenza shot)                                                                                                                                                                                                                   |
|                             |                      | <b>Employer-Sponsored Coverage:</b><br>NS (White);<br>NS (Black);NS (Other);<br>NS (Hispanic);<br><b>Any Private Coverage:</b><br>-1.7%, p < .01 (White);<br>-2.5%, p < .01 (Black);<br>NS (Other);<br>-2.4%, p < .05 (Hispanic).                                                             |                                                                                                                                                                   |                                                                                                                                                                                                                               |                                                                                                                                                                                                                                              |                                                                              |                                                                                                                                                                                                                                                              |                                                                                                                                                                                                                                                 |                                                                                                                                                                                                                                                                |
| Individual Enabling factors | Income               | <b>Jones &amp; Sonfield (2016), Post Medicaid Expansion</b><br><b>Uninsured:</b><br>OR = 2.12, 95% CI [1.67, 2.69], p < .001 (≤138% FPL)<br>(Ref = 139% or >).<br><b>Lee (2018), Post Medicaid Expansion, (Percent difference before versus after ACA (percent change), Insurance status:</b> | <b>Early (2018) Usual source of healthcare (Adjusted Prevalence Ratios)</b><br>NS (51-100% of poverty);<br>NS (101-138% of poverty);<br>(Ref = 0-50% of poverty). | <b>Early (2018) Able to obtain timely medical care: (Adjusted Prevalence Ratios)</b><br>NS (51-100% of poverty);<br>NS (101-138% of poverty);<br>(Ref = 0-50% of poverty);<br><br><b>Able to obtain needed prescriptions:</b> | <b>Lee (2019), Post-Medicaid Expansion (Percent difference after ACA, percent change), Seen/talked to a doctor in 12 months:</b><br>4.10%, 95% CI [2.70, 5.49], p < .05 (≤138% FPL);<br>2.31%, 95% CI [1.12, 3.51], p < .05 (139%–399% FPL); |                                                                              | <b>Pazol (2017), BP checked by healthcare professional in the past year:</b><br>72.9%, 95% CI [70.5–75.3] (≤138% FPL);<br>77.3%, 95% CI [74.3–80.1] (139%–250% FPL);<br>83.0%, 95% CI [80.1–85.5] (251%–400% FPL);<br>89.4%, 95% CI [87.4–91.2] (>400% FPL). | <b>Lee (2019), Post-Medicaid Expansion (Percent difference after ACA, percent change), Had Cholesterol screening (45-64 years):</b><br>7.11%, 95% CI [4.86, 9.35], p < .05 (≤138% FPL);<br>4.71%, 95% CI [3.11, 6.31], p < .05 (139%–399% FPL); | <b>Pazol (2017), Influenza vaccine in the past year:</b><br>24.2%, 95% CI [22.2–26.4] (≤138% FPL);<br>28.6%, 95% CI [25.8–31.6] (139%–250% FPL);<br>31.0%, 95% CI [28.2–34.0] (251%–400% FPL);<br>41.8%, 95% CI [38.9–44.7] (>400% FPL).<br><b>Lee (2019),</b> |

| Andersen's domains |                      | Measures of potential access                                                                                                                                                                                                                                                                                                                                                                                                                                                                                                                                                                                                                                                                                            |                                                    |                                                                                                                                                                                                                                                                                                                                                                                                                                                                                                                                                                                                                                                     | Measures of realized access                                                                                                                                                                                                                                                                                                                                                                                                                                                        |                                                                              |                                                                                                                                                                                                                                                                                                                                                                              |                                                                                                             |                                                                                                                                                                                                                                                                                                                                                                                        |
|--------------------|----------------------|-------------------------------------------------------------------------------------------------------------------------------------------------------------------------------------------------------------------------------------------------------------------------------------------------------------------------------------------------------------------------------------------------------------------------------------------------------------------------------------------------------------------------------------------------------------------------------------------------------------------------------------------------------------------------------------------------------------------------|----------------------------------------------------|-----------------------------------------------------------------------------------------------------------------------------------------------------------------------------------------------------------------------------------------------------------------------------------------------------------------------------------------------------------------------------------------------------------------------------------------------------------------------------------------------------------------------------------------------------------------------------------------------------------------------------------------------------|------------------------------------------------------------------------------------------------------------------------------------------------------------------------------------------------------------------------------------------------------------------------------------------------------------------------------------------------------------------------------------------------------------------------------------------------------------------------------------|------------------------------------------------------------------------------|------------------------------------------------------------------------------------------------------------------------------------------------------------------------------------------------------------------------------------------------------------------------------------------------------------------------------------------------------------------------------|-------------------------------------------------------------------------------------------------------------|----------------------------------------------------------------------------------------------------------------------------------------------------------------------------------------------------------------------------------------------------------------------------------------------------------------------------------------------------------------------------------------|
| Type               | Determinants/factors | Insurance coverage/type                                                                                                                                                                                                                                                                                                                                                                                                                                                                                                                                                                                                                                                                                                 | Usual source of care/regular primary care provider | Barriers to care, delayed, foregone care, unmet need                                                                                                                                                                                                                                                                                                                                                                                                                                                                                                                                                                                                | Utilization (use/non-use or frequency of use)                                                                                                                                                                                                                                                                                                                                                                                                                                      | Preventive health visits (annual physical exam/routine checkup in last year) | Preventive health screening (blood pressure)                                                                                                                                                                                                                                                                                                                                 | Preventive health screening (cholesterol screening)                                                         | Preventive health screening (Influenza shot)                                                                                                                                                                                                                                                                                                                                           |
|                    |                      | <p><b>Private:</b><br/>4.36%, 95% CI [2.77, 5.95] (<math>\leq 138\%</math> FPL);<br/>3.60%, 95% CI [2.38, 4.83] (139–399% FPL);<br/>NS (<math>\geq 400\%</math> FPL);</p> <p><b>Medicare/Medicaid/Other Public:</b><br/>9.61%, 95% CI [7.75, 11.47] (<math>\leq 138\%</math> FPL);<br/>4.73%, 95% CI [3.83, 5.63] (139–399% FPL);<br/>0.35%, 95% CI [-0.19, 0.89] (<math>\geq 400\%</math> FPL);</p> <p><b>Uninsured:</b><br/>-14.5%, 95% CI [-15.9, -13.1] (<math>\leq 138\%</math> FPL);<br/>-8.74%, 95% CI [-9.63, -7.85] (139–399% FPL);<br/>1.92%, 95% CI [-2.34, -1.50] (<math>\geq 400\%</math> FPL);</p> <p><u>Difference in percentage point change between FPL groups</u></p> <p><b>Insurance status:</b></p> |                                                    | <p><b>(Adjusted Prevalence Ratios)</b><br/>NS (51-100% of poverty);<br/>NS (101-138% of poverty);<br/>(Ref = 0-50% of poverty).</p> <p><b>Lee (2018), Post-Medicaid Expansion (Percent difference before versus after ACA (percent change),</b></p> <p><b>Affordability:</b></p> <p><b>Delayed care:</b><br/>-5.93%, 95% CI [-7.16, -4.71] (<math>\leq 138\%</math> FPL);<br/>-3.44%, 95% CI [-4.28, -2.60] (139–399% FPL);<br/>-1.57%, 95% CI [-2.09, -1.04] (<math>\geq 400\%</math> FPL);</p> <p><b>Did not get care:</b><br/>-5.04%, 95% CI [-6.25, -3.83] (<math>\leq 138\%</math> FPL);<br/>-3.05%, 95% CI [-3.76, -2.34] (139–399% FPL);</p> | <p>NS, (<math>\geq 400\%</math> FPL).</p> <p><b>Lee (2020), Family physician visits (past year):</b><br/>NS (Middle income);<br/>NS (High income)<br/>(Ref = low income).</p> <p><b>NP/PA visits (past year):</b><br/>NS (Middle income);<br/>NS (High income)<br/>(Ref = low income).</p> <p><b>Seo (2019), Doctors visits in the past year:</b><br/>OR = 0.654, 95% CI [0.45–0.94], p = .026 (All women, 139%–399%);<br/>NS (NBWA, 139%–399%);<br/>NS (FBAI, 139%–399% FPL);</p> |                                                                              | <p><b>Lee (2019), Post-Medicaid Expansion (Percent difference after ACA, percent change),</b></p> <p><b>Had BP screening:</b><br/>4.45%, 95% CI [3.21, 5.69], p &lt; .05 (<math>\leq 138\%</math> FPL);<br/>2.92%, 95% CI [2.02, 3.81], p &lt; .05 (139%–399%);<br/>1.04%, 95% CI [0.32, 1.75], p &lt; .05 (<math>\leq 138\%</math> FPL vs <math>\geq 400\%</math> FPL).</p> | <p>1.78%, 95% CI [0.26, 3.30], p &lt; .05 (<math>\leq 138\%</math> FPL vs <math>\geq 400\%</math> FPL).</p> | <p><b>Post Medicaid Expansion (Percent difference after ACA, percent change),</b></p> <p><b>Receipt of Influenza immunization:</b><br/>5.55%, 95% CI [4.17, 6.94], p &lt; .05 (<math>\leq 138\%</math> FPL);<br/>4.17%, 95% CI [3.01, 5.34], p &lt; .05, (139%–399% FPL);<br/>3.47%, 95% CI [2.20, 4.73], p &lt; .05 (<math>\leq 138\%</math> FPL vs <math>\geq 400\%</math> FPL).</p> |

| Andersen's domains |                      | Measures of potential access                                                                                                                                                                                                                                                                                                                                                             |                                                    |                                                                                                                                                                                                                                                                                                                                                                                                                                                                                                                                                                                                                                                                                                                                              | Measures of realized access                                                                                                                   |                                                                              |                                              |                                                     |                                              |
|--------------------|----------------------|------------------------------------------------------------------------------------------------------------------------------------------------------------------------------------------------------------------------------------------------------------------------------------------------------------------------------------------------------------------------------------------|----------------------------------------------------|----------------------------------------------------------------------------------------------------------------------------------------------------------------------------------------------------------------------------------------------------------------------------------------------------------------------------------------------------------------------------------------------------------------------------------------------------------------------------------------------------------------------------------------------------------------------------------------------------------------------------------------------------------------------------------------------------------------------------------------------|-----------------------------------------------------------------------------------------------------------------------------------------------|------------------------------------------------------------------------------|----------------------------------------------|-----------------------------------------------------|----------------------------------------------|
| Type               | Determinants/factors | Insurance coverage/type                                                                                                                                                                                                                                                                                                                                                                  | Usual source of care/regular primary care provider | Barriers to care, delayed, foregone care, unmet need                                                                                                                                                                                                                                                                                                                                                                                                                                                                                                                                                                                                                                                                                         | Utilization (use/non-use or frequency of use)                                                                                                 | Preventive health visits (annual physical exam/routine checkup in last year) | Preventive health screening (blood pressure) | Preventive health screening (cholesterol screening) | Preventive health screening (Influenza shot) |
|                    |                      | <p><b>Private:</b><br/>2.84%, 95% CI [1.07, 4.60] (<math>\leq</math> 138% FPL vs. <math>\geq</math> 400% FPL);</p> <p><b>Medicare/Medicaid/Other Public:</b><br/>9.26%, 95% CI [7.36, 11.16] (<math>\leq</math> 138% FPL vs. <math>\geq</math> 400% FPL);</p> <p><b>Uninsured:</b><br/>-12.59%, 95% CI [-14.12, -11.07] (<math>\leq</math> 138% FPL vs. <math>\geq</math> 400% FPL).</p> |                                                    | <p>-1.09%, 95% CI [-1.46, -0.71] (<math>\geq</math> 400% FPL);</p> <p><b>Problems paying medical bills:</b><br/>-5.64%, 95% CI [-7.42, -3.86] (<math>\leq</math>138% FPL);</p> <p>-4.36%, 95% CI [-5.56, -3.17] (139–399% FPL);</p> <p>-1.07%, 95% CI [-1.82, -0.31] (<math>\geq</math> 400% FPL);</p> <p><b><u>Difference in percentage point change between FPL groups.</u></b></p> <p><b>Affordability:</b></p> <p><b>Delayed care:</b><br/>-4.37%, 95% CI [-5.73, -3.00] (<math>\leq</math> 138% FPL vs. <math>\geq</math> 400% FPL);</p> <p><b>Did not get care:</b><br/>-3.95%, 95% CI [-5.24, -2.66] (<math>\leq</math> 138% FPL vs. <math>\geq</math> 400% FPL);</p> <p><b>Problems paying medical bills:</b><br/>-4.57%, 95% CI</p> | <p>NS (All women, 400% FPL or &gt;);</p> <p>NS (NBWA, 400% FPL or &gt;);</p> <p>NS (FBAI or 400% FPL or &gt;)</p> <p>(Ref = 0%–138% FPL).</p> |                                                                              |                                              |                                                     |                                              |

| Andersen's domains |                      | Measures of potential access |                                                    |                                                                                                                                                                                                                                                                                                                                                                                                                                                                                                                                                                                                                                                                                                                    | Measures of realized access                   |                                                                              |                                              |                                                     |                                              |
|--------------------|----------------------|------------------------------|----------------------------------------------------|--------------------------------------------------------------------------------------------------------------------------------------------------------------------------------------------------------------------------------------------------------------------------------------------------------------------------------------------------------------------------------------------------------------------------------------------------------------------------------------------------------------------------------------------------------------------------------------------------------------------------------------------------------------------------------------------------------------------|-----------------------------------------------|------------------------------------------------------------------------------|----------------------------------------------|-----------------------------------------------------|----------------------------------------------|
| Type               | Determinants/factors | Insurance coverage/type      | Usual source of care/regular primary care provider | Barriers to care, delayed, foregone care, unmet need                                                                                                                                                                                                                                                                                                                                                                                                                                                                                                                                                                                                                                                               | Utilization (use/non-use or frequency of use) | Preventive health visits (annual physical exam/routine checkup in last year) | Preventive health screening (blood pressure) | Preventive health screening (cholesterol screening) | Preventive health screening (Influenza shot) |
|                    |                      |                              |                                                    | <p>[-6.49, -2.64] (<math>\leq</math> 138% FPL vs. <math>\geq</math> 400% FPL).</p> <p><b>Lee (2019),</b><br/> <u>Post Medicaid Expansion</u><br/> <u>(Percent difference after ACA, percent change)</u></p> <p><b>Insurance affordability (difficult to find affordable insurance):</b><br/> -25.24%, 95% CI [-32.79, -17.68], <math>p &lt; .05</math> (<math>\leq</math>138% FPL);<br/> -13.28%, 95% CI [-17.37, -9.19], <math>p &lt; .05</math> (139%-399% FPL);<br/> NS (<math>\geq</math>400% FPL).</p> <p><b>SteelFisher (2019),</b><br/> <b>Avoided doctor due to discrimination concerns:</b><br/> NS (\$25k-&lt;50k);<br/> NS (\$50k-&lt;75k);<br/> NS (\$75k+)<br/> (Ref = <math>\leq</math>&lt;25k).</p> |                                               |                                                                              |                                              |                                                     |                                              |

| Andersen's domains |                                             | Measures of potential access |                                                                                                                                                                                                                                                                                                                                                                                                                                                                                                                 |                                                                                                                                                                                                                                                                                                                                                                                                                                                          | Measures of realized access                                                                                                                                                                                                                                                                                                                                                                                                                                                                                        |                                                                                                                    |                                                                                                                                                                                                                                                                                                                                                      |                                                     |                                                                                                                                                                                                                                                                                                                                |
|--------------------|---------------------------------------------|------------------------------|-----------------------------------------------------------------------------------------------------------------------------------------------------------------------------------------------------------------------------------------------------------------------------------------------------------------------------------------------------------------------------------------------------------------------------------------------------------------------------------------------------------------|----------------------------------------------------------------------------------------------------------------------------------------------------------------------------------------------------------------------------------------------------------------------------------------------------------------------------------------------------------------------------------------------------------------------------------------------------------|--------------------------------------------------------------------------------------------------------------------------------------------------------------------------------------------------------------------------------------------------------------------------------------------------------------------------------------------------------------------------------------------------------------------------------------------------------------------------------------------------------------------|--------------------------------------------------------------------------------------------------------------------|------------------------------------------------------------------------------------------------------------------------------------------------------------------------------------------------------------------------------------------------------------------------------------------------------------------------------------------------------|-----------------------------------------------------|--------------------------------------------------------------------------------------------------------------------------------------------------------------------------------------------------------------------------------------------------------------------------------------------------------------------------------|
| Type               | Determinants/factors                        | Insurance coverage/type      | Usual source of care/regular primary care provider                                                                                                                                                                                                                                                                                                                                                                                                                                                              | Barriers to care, delayed, foregone care, unmet need                                                                                                                                                                                                                                                                                                                                                                                                     | Utilization (use/non-use or frequency of use)                                                                                                                                                                                                                                                                                                                                                                                                                                                                      | Preventive health visits (annual physical exam/routine checkup in last year)                                       | Preventive health screening (blood pressure)                                                                                                                                                                                                                                                                                                         | Preventive health screening (cholesterol screening) | Preventive health screening (Influenza shot)                                                                                                                                                                                                                                                                                   |
|                    | Insurance (no insurance, type of insurance) |                              | <p>Ahad (2019), Regular healthcare provider: OR = .20, 95% CI [.06-.70], p &lt; .05 (Medicaid or Medi-Cal health insurance); NS (No health insurance).</p> <p>Early (2018) <u>Post-Medicaid Expansion</u></p> <p>Has Usual Source of Care: (Adjusted Prevalence Ratios)</p> <p><u>Type of Health Insurance Coverage</u></p> <p>aPR = 1.43 [95% CI [1.26, 1.62] (Medi-Cal); aPR = 1.55 [95% CI [1.37, 1.75] (Private); aPR = 1.39 [95% CI [1.16, 1.66] (Other Public) (Ref = Uninsured).</p> <p>Early (2018)</p> | <p>Early (2018) <u>Post-Medicaid Expansion</u></p> <p>Able to obtain timely medical care: (Adjusted Prevalence Ratios)</p> <p>Type of health insurance coverage</p> <p>NS (Medi-Cal); NS (Private); NS (Public); Ref = No insurance).</p> <p>Able to obtain needed prescriptions</p> <p>NS (Medi-Cal); NS (Private); NS (Public); Ref = No insurance).</p> <p>Early (2018) <u>Post-Medicaid Expansion</u></p> <p>Able to obtain timely medical care:</p> | <p>Lee (2020), <u>Family physician visits (past year)</u>: 11.7%, 95% CI [10.2, 13.2], p &lt; .001 (Health insurance); <u>NP/PA visits (past year)</u>: 4.8%, 95% CI [3.2, 6.4], p &lt; .001 (Health insurance).</p> <p>Seo (2019), <u>Doctors visits in the past year</u>: OR = 0.291, 95% CI [0.16–0.52], p &lt; 0.001 (All women, uninsured); OR = 0.321, 95% CI [0.17–0.61], p &lt; 0.001 (NBWA, uninsured); OR = 0.245, 95% CI [0.08–0.79], p = .022 (FBAI, uninsured); NS (All women, Public insurance);</p> | <p>DiPietro Mager (2021), <u>Routine check-up past year</u>: NS (Any insurance coverage) (Ref = no insurance).</p> | <p>Pazol (2017), <u>BP checked by a healthcare professional in the past year</u>: 87.3%, 95% CI [86.0–88.5] (Had insurance coverage continuously during the past year); 81.0%, 95% CI [77.4–84.1] (Had insurance coverage with gaps during the past year); 51.6%, 95% CI [47.7–55.4] (Did not have any insurance coverage during the past year).</p> |                                                     | <p>Pazol (2017), <u>Influenza vaccine in the past year</u>: 37.0%, 95% CI [35.4–38.6] (Had insurance coverage continuously during the past year); 24.0%, 95% CI [20.8–27.6] (Had insurance coverage with gaps during the past year); 14.1%, 95% CI [11.8–16.7] (Did not have any insurance coverage during the past year).</p> |

| Andersen's domains |                      | Measures of potential access |                                                                                                                                                                                                                                                                                                                                                                                                                                                                                                                                                                                                                  |                                                                                                                                                                                                                                                                                                                                                                                                                                                                                         | Measures of realized access                                                                                                                                                                                                                  |                                                                              |                                              |                                                     |                                              |
|--------------------|----------------------|------------------------------|------------------------------------------------------------------------------------------------------------------------------------------------------------------------------------------------------------------------------------------------------------------------------------------------------------------------------------------------------------------------------------------------------------------------------------------------------------------------------------------------------------------------------------------------------------------------------------------------------------------|-----------------------------------------------------------------------------------------------------------------------------------------------------------------------------------------------------------------------------------------------------------------------------------------------------------------------------------------------------------------------------------------------------------------------------------------------------------------------------------------|----------------------------------------------------------------------------------------------------------------------------------------------------------------------------------------------------------------------------------------------|------------------------------------------------------------------------------|----------------------------------------------|-----------------------------------------------------|----------------------------------------------|
| Type               | Determinants/factors | Insurance coverage/type      | Usual source of care/regular primary care provider                                                                                                                                                                                                                                                                                                                                                                                                                                                                                                                                                               | Barriers to care, delayed, foregone care, unmet need                                                                                                                                                                                                                                                                                                                                                                                                                                    | Utilization (use/non-use or frequency of use)                                                                                                                                                                                                | Preventive health visits (annual physical exam/routine checkup in last year) | Preventive health screening (blood pressure) | Preventive health screening (cholesterol screening) | Preventive health screening (Influenza shot) |
|                    |                      |                              | <b>Post-Medicaid Expansion</b><br><b>Has Usual Source of Care:</b><br><u><b>Type of Health Insurance Coverage</b></u><br><b>(Adjusted Prevalence Ratios)</b><br><b>Medi-Cal</b><br>NS (2014);<br>NS (2015);<br>NS (2016);<br>(Ref = 2013);<br><b>Private</b><br>NS (2014);<br>NS (2015);<br>NS (2016);<br>(Ref = 2013);<br><b>Uninsured</b><br>NS (2014);<br>NS (2015);<br>NS (2016);<br>(Ref = 2013);<br><b>Able to obtain needed prescriptions:</b><br><u><b>Type of Health Insurance Coverage</b></u><br><br><b>(Adjusted Prevalence Ratios)</b><br><b>Medi-Cal</b><br>NS (2014);<br>NS (2015);<br>NS (2016); | <b>(Adjusted Prevalence Ratios)</b><br><b>Medi-Cal</b><br>NS (2014);<br>NS (2015);<br>NS (2016);<br>(Ref = 2013);<br><b>Private</b><br>NS (2014);<br>NS (2015);<br>NS (2016);<br>(Ref = 2013);<br><b>Uninsured</b><br>NS (2014);<br>NS (2015);<br>NS (2016);<br>(Ref = 2013);<br><b>Able to obtain needed prescriptions:</b><br><u><b>Type of Health Insurance Coverage</b></u><br><br><b>(Adjusted Prevalence Ratios)</b><br><b>Medi-Cal</b><br>NS (2014);<br>NS (2015);<br>NS (2016); | NS (NBWA, Public insurance)<br>NS (FBAI, Public insurance);<br>NS (All women, Privately purchased insurance);<br>NS (NBWA, Privately purchased insurance)<br>NS (FBAI, Privately purchased insurance)<br>(Ref = Employment-based insurance). |                                                                              |                                              |                                                     |                                              |

| Andersen's domains |                         | Measures of potential access |                                                    |                                                                                                                                                                                                                                                                                                                                                                      | Measures of realized access                   |                                                                                                                                          |                                              |                                                     |                                              |
|--------------------|-------------------------|------------------------------|----------------------------------------------------|----------------------------------------------------------------------------------------------------------------------------------------------------------------------------------------------------------------------------------------------------------------------------------------------------------------------------------------------------------------------|-----------------------------------------------|------------------------------------------------------------------------------------------------------------------------------------------|----------------------------------------------|-----------------------------------------------------|----------------------------------------------|
| Type               | Determinants/factors    | Insurance coverage/type      | Usual source of care/regular primary care provider | Barriers to care, delayed, foregone care, unmet need                                                                                                                                                                                                                                                                                                                 | Utilization (use/non-use or frequency of use) | Preventive health visits (annual physical exam/routine checkup in last year)                                                             | Preventive health screening (blood pressure) | Preventive health screening (cholesterol screening) | Preventive health screening (Influenza shot) |
|                    |                         |                              |                                                    | (Ref = 2013);<br><b>Private</b><br>NS (2014);<br>NS (2015);<br>NS (2016);<br>(Ref = 2013);<br><b>Uninsured</b><br>NS (2014);<br>NS (2015);<br>NS (2016);<br>(Ref = 2013);<br><b>SteelFisher (2019),</b><br><u>Avoided doctor due to discrimination concerns:</u><br>NS (Medicaid);<br>OR = 8.57, 95% CI [2.91, 25.24], p < .05 (Uninsured);<br>(Ref = Non-Medicaid). |                                               |                                                                                                                                          |                                              |                                                     |                                              |
|                    | Residence (Urban/Rural) |                              |                                                    |                                                                                                                                                                                                                                                                                                                                                                      |                                               | <b>Lee (2020),</b><br><b>Any medical provider visits (past year):</b><br>NS (Rural/urban difference);<br><b>Visits with primary care</b> |                                              |                                                     |                                              |



| Andersen's domains |                               | Measures of potential access |                                                                                                 |                                                      | Measures of realized access                                                                                                                                                                                                                                                                           |                                                                              |                                              |                                                     |                                              |
|--------------------|-------------------------------|------------------------------|-------------------------------------------------------------------------------------------------|------------------------------------------------------|-------------------------------------------------------------------------------------------------------------------------------------------------------------------------------------------------------------------------------------------------------------------------------------------------------|------------------------------------------------------------------------------|----------------------------------------------|-----------------------------------------------------|----------------------------------------------|
| Type               | Determinants/factors          | Insurance coverage/type      | Usual source of care/regular primary care provider                                              | Barriers to care, delayed, foregone care, unmet need | Utilization (use/non-use or frequency of use)                                                                                                                                                                                                                                                         | Preventive health visits (annual physical exam/routine checkup in last year) | Preventive health screening (blood pressure) | Preventive health screening (cholesterol screening) | Preventive health screening (Influenza shot) |
|                    |                               |                              |                                                                                                 |                                                      | <p><b>providers (past year):</b><br/>4.2%, 95% CI [1.1, 7.3], p = .008 (Rural/urban difference);</p> <p><b>Family physician visits (past year):</b><br/>NS (Rural/urban difference);</p> <p><b>NP/PAs visits (past year):</b><br/>8.5%, 95% CI [4.9, 12.1], p &lt; .001 (Rural/urban difference).</p> |                                                                              |                                              |                                                     |                                              |
|                    | Access to Good Public Transit |                              | <p><b>Ahad (2019) Regular healthcare provider:</b><br/>NS. (Access to good public transit).</p> |                                                      |                                                                                                                                                                                                                                                                                                       |                                                                              |                                              |                                                     |                                              |
|                    | Usual Source of Care          |                              |                                                                                                 |                                                      | <p><b>Seo (2019), Doctors visits in the past year:</b><br/>OR = 3.890, 95% CI 2.46, 6.15], p &lt; .001 (All women, usual source of care);</p>                                                                                                                                                         |                                                                              |                                              |                                                     |                                              |

| Andersen's domains      |                               | Measures of potential access |                                                                             |                                                      | Measures of realized access                                                                                                                                                     |                                                                              |                                              |                                                     |                                              |
|-------------------------|-------------------------------|------------------------------|-----------------------------------------------------------------------------|------------------------------------------------------|---------------------------------------------------------------------------------------------------------------------------------------------------------------------------------|------------------------------------------------------------------------------|----------------------------------------------|-----------------------------------------------------|----------------------------------------------|
| Type                    | Determinants/factors          | Insurance coverage/type      | Usual source of care/regular primary care provider                          | Barriers to care, delayed, foregone care, unmet need | Utilization (use/non-use or frequency of use)                                                                                                                                   | Preventive health visits (annual physical exam/routine checkup in last year) | Preventive health screening (blood pressure) | Preventive health screening (cholesterol screening) | Preventive health screening (Influenza shot) |
|                         |                               |                              |                                                                             |                                                      | OR = 4.637, 95% CI [2.77, 7.77], p < .001 (NBWA, usual source of care); OR = 2.970, 95% CI [1.20, 7.32], p = .021 (FBAI, usual source of care) (Ref = no usual source of care). |                                                                              |                                              |                                                     |                                              |
| Individual Need factors | BMI > 25.0                    |                              | Ahad (2019), Regular healthcare provider: NS (BMI >25.0).                   |                                                      |                                                                                                                                                                                 |                                                                              |                                              |                                                     |                                              |
|                         | Depression (PHQ2 score > 2.0) |                              | Ahad (2019), Regular healthcare provider: NS (HQ-2 depression score ≥ 2.0). |                                                      |                                                                                                                                                                                 |                                                                              |                                              |                                                     |                                              |
|                         | History of chronic disease    |                              |                                                                             |                                                      | Seo (2019), Doctors' visits in the past year: OR = 1.907, 95% CI [1.16, 3.13], p = .013 (All women, with chronic disease); OR = 1.725, 95% CI [1.02,                            |                                                                              |                                              |                                                     |                                              |

| Andersen's domains |                                  | Measures of potential access                                                                                                                                                                       |                                                                                                                    |                                                      | Measures of realized access                                                                                                                                    |                                                                                                                                                                                                                |                                              |                                                     |                                                                                                                                                                                                               |
|--------------------|----------------------------------|----------------------------------------------------------------------------------------------------------------------------------------------------------------------------------------------------|--------------------------------------------------------------------------------------------------------------------|------------------------------------------------------|----------------------------------------------------------------------------------------------------------------------------------------------------------------|----------------------------------------------------------------------------------------------------------------------------------------------------------------------------------------------------------------|----------------------------------------------|-----------------------------------------------------|---------------------------------------------------------------------------------------------------------------------------------------------------------------------------------------------------------------|
| Type               | Determinants/factors             | Insurance coverage/type                                                                                                                                                                            | Usual source of care/regular primary care provider                                                                 | Barriers to care, delayed, foregone care, unmet need | Utilization (use/non-use or frequency of use)                                                                                                                  | Preventive health visits (annual physical exam/routine checkup in last year)                                                                                                                                   | Preventive health screening (blood pressure) | Preventive health screening (cholesterol screening) | Preventive health screening (Influenza shot)                                                                                                                                                                  |
|                    |                                  |                                                                                                                                                                                                    |                                                                                                                    |                                                      | 2.93], p = .047 (NBWA, with chronic disease);<br>OR = 2.394, 5% CI [1.07, 5.38], p = .038 (FBAI, with chronic disease)<br><br>(Ref = Without chronic disease). |                                                                                                                                                                                                                |                                              |                                                     |                                                                                                                                                                                                               |
|                    | History of mental health illness | <b>Massetti (2017), Has healthcare coverage:</b><br>79.9%, 95% CI [78.7, 81.1] (Mental Health problems);<br>80.5%, 95% CI [79.7, 81.3] (No Mental Health problems) (difference between groups NS). |                                                                                                                    |                                                      |                                                                                                                                                                | <b>Massetti (2017), Had a check-up in 2 past years:</b><br>79.5%, 95% CI [78.3, 80.6] (Mental Health problems);<br>82.2% 95% CI [81.5, 83.0] (No Mental Health problems) (difference between groups p < .001). |                                              |                                                     | <b>Massetti (2017), Influenza vaccination in past year:</b><br>31.9%, 95% CI [30.6, 33.3] (Mental Health problems);<br>33.6% 95% CI [32.7, 34.5] (No Mental Health problems), (difference between groups NS). |
|                    | Hypertension                     |                                                                                                                                                                                                    | <b>Ahad (2019), Regular healthcare provider:</b><br>OR = 8.57, 95% CI [1.45-50.73], p < .05 (High blood pressure). |                                                      |                                                                                                                                                                |                                                                                                                                                                                                                |                                              |                                                     |                                                                                                                                                                                                               |

| Andersen's domains |                        | Measures of potential access                                                                                                                                                                                                                            |                                                                                                        |                                                                          | Measures of realized access                                                                                                                                                                                                                                                                                                                                                                                        |                                                                              |                                              |                                                     |                                              |
|--------------------|------------------------|---------------------------------------------------------------------------------------------------------------------------------------------------------------------------------------------------------------------------------------------------------|--------------------------------------------------------------------------------------------------------|--------------------------------------------------------------------------|--------------------------------------------------------------------------------------------------------------------------------------------------------------------------------------------------------------------------------------------------------------------------------------------------------------------------------------------------------------------------------------------------------------------|------------------------------------------------------------------------------|----------------------------------------------|-----------------------------------------------------|----------------------------------------------|
| Type               | Determinants/factors   | Insurance coverage/type                                                                                                                                                                                                                                 | Usual source of care/regular primary care provider                                                     | Barriers to care, delayed, foregone care, unmet need                     | Utilization (use/non-use or frequency of use)                                                                                                                                                                                                                                                                                                                                                                      | Preventive health visits (annual physical exam/routine checkup in last year) | Preventive health screening (blood pressure) | Preventive health screening (cholesterol screening) | Preventive health screening (Influenza shot) |
|                    | Self-assessed health   | <p>Chen (2020) <u>Gained Medicaid Coverage in 2014 in Expansion States (N=149)</u></p> <p>Uninsured in 2013:<br/>OR = 4.50, 95% CI [1.23, 16.48], p = 0.024 (Health status - Fair or poor)<br/>(Ref = Health status excellent, very good, or good).</p> | <p>Ahad (2019), Regular healthcare provider:<br/>NS (Self-assessed health <math>\geq</math> Good).</p> |                                                                          | <p>Lee (2020), Family physician visits (past year):<br/>11.5%, 95% CI [8.4, 14.5], p &lt; .001 (Poor or fair health status);</p> <p>NP/PA visits (past year):<br/>3.4%, 95% CI [1, 5.9], p = 0.006 (Poor or fair health status).</p> <p>Seo (2019), Doctors visit in the past year:<br/>NS (All women, Good or better);<br/>NS (NBWA, Good or better);<br/>NS (FBAI, Good or better)<br/>(Ref = Fair or poor).</p> |                                                                              |                                              |                                                     |                                              |
|                    | Psychological distress |                                                                                                                                                                                                                                                         |                                                                                                        | <p>Johnson (2020), Medical care delayed due to cost, past 12 months:</p> |                                                                                                                                                                                                                                                                                                                                                                                                                    |                                                                              |                                              |                                                     |                                              |

| Andersen's domains |                      | Measures of potential access |                                                    |                                                                                                                                                                                                                                                                                                                                                                                                                                                                                                                                                                                                                                                                                    | Measures of realized access                   |                                                                              |                                              |                                                     |                                              |
|--------------------|----------------------|------------------------------|----------------------------------------------------|------------------------------------------------------------------------------------------------------------------------------------------------------------------------------------------------------------------------------------------------------------------------------------------------------------------------------------------------------------------------------------------------------------------------------------------------------------------------------------------------------------------------------------------------------------------------------------------------------------------------------------------------------------------------------------|-----------------------------------------------|------------------------------------------------------------------------------|----------------------------------------------|-----------------------------------------------------|----------------------------------------------|
| Type               | Determinants/factors | Insurance coverage/type      | Usual source of care/regular primary care provider | Barriers to care, delayed, foregone care, unmet need                                                                                                                                                                                                                                                                                                                                                                                                                                                                                                                                                                                                                               | Utilization (use/non-use or frequency of use) | Preventive health visits (annual physical exam/routine checkup in last year) | Preventive health screening (blood pressure) | Preventive health screening (cholesterol screening) | Preventive health screening (Influenza shot) |
|                    |                      |                              |                                                    | <p>AOR = 2.0, 95% CI [1.5, 2.6], p &lt; .001 (Moderate distress);</p> <p>AOR = 2.9, 95% CI [2.0, 4.4], p &lt; .001 (Severe distress) (Ref = no distress);</p> <p><b>Needed but couldn't afford care, past 12 months:</b></p> <p>AOR = 1.9, 95% CI [1.3, 2.6], p &lt; .001 (Moderate distress);</p> <p>AOR = 4.1, 95% CI [2.7, 6.4]; p &lt; .001 (Severe distress) (Ref = no distress).</p> <p><b>Needed but couldn't afford mental health care, past 12 months:</b></p> <p>AOR = 6.1, 95% CI [3.3, 11.2], p &lt; .001 (Moderate distress);</p> <p>AOR = 19.7, 95% CI [10.2, 37.8], p &lt; .001 (Severe distress) (Ref = no distress);</p> <p><b>Needed but couldn't afford</b></p> |                                               |                                                                              |                                              |                                                     |                                              |



| Andersen's domains          |                                                                     | Measures of potential access |                                                    |                                                      | Measures of realized access                                                                                                                               |                                                                              |                                              |                                                     |                                              |
|-----------------------------|---------------------------------------------------------------------|------------------------------|----------------------------------------------------|------------------------------------------------------|-----------------------------------------------------------------------------------------------------------------------------------------------------------|------------------------------------------------------------------------------|----------------------------------------------|-----------------------------------------------------|----------------------------------------------|
| Type                        | Determinants/factors                                                | Insurance coverage/type      | Usual source of care/regular primary care provider | Barriers to care, delayed, foregone care, unmet need | Utilization (use/non-use or frequency of use)                                                                                                             | Preventive health visits (annual physical exam/routine checkup in last year) | Preventive health screening (blood pressure) | Preventive health screening (cholesterol screening) | Preventive health screening (Influenza shot) |
| Contextual Enabling factors | County unemployment rate                                            |                              |                                                    |                                                      | Lee (2020),<br>Family physician visits (past year): 0.5%, 95% CI [0.2, 0.8], p < .001;<br>NP/PA visits (past year): -0.5%, 95% CI [-0.8, -0.2], p < .001. |                                                                              |                                              |                                                     |                                              |
|                             | Family medicine physicians per 100,000 population                   |                              |                                                    |                                                      | Lee (2020),<br>Family physician visits (past year): 0.2%, 95% CI [0.1, 0.3], p < .001;<br>NP/PA visits (past year): 0.1%, 95% CI [0, 0.2], p = .002.      |                                                                              |                                              |                                                     |                                              |
|                             | Nurse practitioners and physician assistants per 100,000 population |                              |                                                    |                                                      | Lee (2020),<br>Family physician visits (past year): NS;<br>NP/PA visits (past year): 0.1%, 95% CI [0.1, 0.1], p < .001.                                   |                                                                              |                                              |                                                     |                                              |

| Andersen's domains |                                                                              | Measures of potential access                                                                                                                                                                                                                                                                                                                                                                                                                                                                                                                                                                                      |                                                                                                                                                                                                                                                                                                                                                                                                                                                                                                                                |                                                                                                                                                                                                                                                                                                                                                                                                                                                                                                                                         | Measures of realized access                                                                                                                                                                                        |                                                                                                                                                                                                                           |                                              |                                                                                                            |                                                                                 |
|--------------------|------------------------------------------------------------------------------|-------------------------------------------------------------------------------------------------------------------------------------------------------------------------------------------------------------------------------------------------------------------------------------------------------------------------------------------------------------------------------------------------------------------------------------------------------------------------------------------------------------------------------------------------------------------------------------------------------------------|--------------------------------------------------------------------------------------------------------------------------------------------------------------------------------------------------------------------------------------------------------------------------------------------------------------------------------------------------------------------------------------------------------------------------------------------------------------------------------------------------------------------------------|-----------------------------------------------------------------------------------------------------------------------------------------------------------------------------------------------------------------------------------------------------------------------------------------------------------------------------------------------------------------------------------------------------------------------------------------------------------------------------------------------------------------------------------------|--------------------------------------------------------------------------------------------------------------------------------------------------------------------------------------------------------------------|---------------------------------------------------------------------------------------------------------------------------------------------------------------------------------------------------------------------------|----------------------------------------------|------------------------------------------------------------------------------------------------------------|---------------------------------------------------------------------------------|
| Type               | Determinants/factors                                                         | Insurance coverage/type                                                                                                                                                                                                                                                                                                                                                                                                                                                                                                                                                                                           | Usual source of care/regular primary care provider                                                                                                                                                                                                                                                                                                                                                                                                                                                                             | Barriers to care, delayed, foregone care, unmet need                                                                                                                                                                                                                                                                                                                                                                                                                                                                                    | Utilization (use/non-use or frequency of use)                                                                                                                                                                      | Preventive health visits (annual physical exam/routine checkup in last year)                                                                                                                                              | Preventive health screening (blood pressure) | Preventive health screening (cholesterol screening)                                                        | Preventive health screening (Influenza shot)                                    |
|                    | Pre/post-implementation of ACA Medicaid expansion (various outcome measures) | <p>Chen (2020), <u>Probability of insurance type in 2014 based on 2013 insurance type - Expansion State</u></p> <p><b>Uninsured 2014:</b> 50.0%, p &lt;.01 (Uninsured); 2.9%, p &lt; 0.01 (Medicaid); NS (Group);</p> <p><b>Medicaid 2014:</b> 38.7%, p &lt; 0.01 (Uninsured); 94.6%, p &lt; 0.01 (Medicaid); NS (Group);</p> <p><b>Group (2014):</b> NS (Uninsured); NS (Medicaid); NS (Group);</p> <p><u>Probability of insurance type in 2014 based on 2013 insurance type - Non-Expansion State</u></p> <p><b>Uninsured 2014:</b> NS (Uninsured); NS (Medicaid); NS (Group);</p> <p><b>Medicaid 2014:</b></p> | <p>Daw (2019), <u>Post-Medicaid Expansion Years 2 and 3 (Post policy)</u></p> <p><b>No Usual Source of Care:</b> -2.4%, 95% CI [-4.5, -0.3].</p> <p><b>Early (2018) Post-Medicaid Expansion</b></p> <p><b>Has Usual Source of Care: (Adjusted Prevalence Ratios)</b></p> <p>NS (2014); NS (2015); NS (2016); (Ref = 2013);</p> <p><u>Type of Health Insurance Coverage</u></p> <p>1.43 (Medi-Cal); 1.55 (Private); 1.39 (Other Public)</p> <p>(Ref = No insurance).</p> <p><b>Farietta (2018), Post-Medicaid Expansion</b></p> | <p>Daw (2019), <u>Post-Medicaid Expansion Years 2 and 3 (Post policy)</u></p> <p><b>Delayed or did not receive medical care because of cost:</b> -1.5%, 5% CI [-2.6, -0.5].</p> <p><b>Early (2018) Post-Medicaid Expansion</b></p> <p><b>Able to obtain timely medical care: (Adjusted Prevalence Ratios)</b></p> <p>NS (2014); NS (2015); NS (2016); (Ref = 2013);</p> <p><b>Able to obtain needed prescriptions:</b></p> <p>NS (2014); NS (2015); NS (2016); (Ref = 2013);</p> <p><b>Farietta (2018), Post-Medicaid Expansion</b></p> | <p>Farietta (2018), <u>Post-Medicaid Expansion</u></p> <p><b>Physician in the past year:</b> NS.</p> <p><b>Johnston (2018), Post-Medicaid Expansion</b></p> <p><b>Primary care visit in the past year:</b> NS.</p> | <p>Margerison (2020), <u>Post Medicaid Expansion</u></p> <p><b>Check-up in last year:</b> 5.1%, 95% CI [1.8, 8.4], p &lt;.05.</p> <p><b>Simon (2017), Post-Medicaid Expansion</b></p> <p><b>Routine check-up:</b> NS.</p> |                                              | <p>Margerison (2020), <u>Post Medicaid Expansion</u></p> <p><b>Cholesterol check-in last year:</b> NS.</p> | <p>Simon (2017), <u>Post-Medicaid Expansion</u></p> <p><b>Flu shot:</b> NS.</p> |



| Andersen's domains |                      | Measures of potential access                                                                                                                                                                                                                                                                                                                                                                                                                                                                                                                                                                                                                            |                                                                                                                                                                                                                                                                                                                                                                                                                                                |                                                                                                                                                                                                                                                                                                                                                                                                                                                                                                                                                                                                                                                                                                                                                                                                                                             | Measures of realized access                   |                                                                              |                                              |                                                     |                                              |
|--------------------|----------------------|---------------------------------------------------------------------------------------------------------------------------------------------------------------------------------------------------------------------------------------------------------------------------------------------------------------------------------------------------------------------------------------------------------------------------------------------------------------------------------------------------------------------------------------------------------------------------------------------------------------------------------------------------------|------------------------------------------------------------------------------------------------------------------------------------------------------------------------------------------------------------------------------------------------------------------------------------------------------------------------------------------------------------------------------------------------------------------------------------------------|---------------------------------------------------------------------------------------------------------------------------------------------------------------------------------------------------------------------------------------------------------------------------------------------------------------------------------------------------------------------------------------------------------------------------------------------------------------------------------------------------------------------------------------------------------------------------------------------------------------------------------------------------------------------------------------------------------------------------------------------------------------------------------------------------------------------------------------------|-----------------------------------------------|------------------------------------------------------------------------------|----------------------------------------------|-----------------------------------------------------|----------------------------------------------|
| Type               | Determinants/factors | Insurance coverage/type                                                                                                                                                                                                                                                                                                                                                                                                                                                                                                                                                                                                                                 | Usual source of care/regular primary care provider                                                                                                                                                                                                                                                                                                                                                                                             | Barriers to care, delayed, foregone care, unmet need                                                                                                                                                                                                                                                                                                                                                                                                                                                                                                                                                                                                                                                                                                                                                                                        | Utilization (use/non-use or frequency of use) | Preventive health visits (annual physical exam/routine checkup in last year) | Preventive health screening (blood pressure) | Preventive health screening (cholesterol screening) | Preventive health screening (Influenza shot) |
|                    |                      | NS (Uninsured);<br>NS (Medicaid);<br>NS (Group);<br><b>Group (2014)</b><br>NS (Uninsured);<br>NS (Medicaid);<br>NS (Group).<br><b>Courtemanche (2019),<br/>           Full ACA (w/<br/>           Medicaid):</b><br>9.6%, p < .001<br>(Any insurance);<br>3%, p < .001 (Any<br>private);<br>2.3%, p < .001<br>(Employer-<br>sponsored);<br>0.8%, p < .05,<br>(Individually<br>purchased);<br>6.7%, p < .001<br>(Medicaid);<br>NS (Other).<br><b>Daw (2019)<br/>           Post-Medicaid<br/>           Expansion<br/>           Years 2 and 3<br/>           (Post policy)<br/>           Current insurance<br/>           status:</b><br>-7.4%, 95% CI | <b>Usual source of<br/>           care:</b><br>NS.<br><b>Johnston (2018),<br/>           No personal<br/>           doctor:</b><br>NS.<br><b>Simon (2017),<br/>           Post-Medicaid<br/>           Expansion</b><br><b>Have a personal<br/>           doctor:</b><br>NS.<br><b>Sommers (2015),<br/>           Post-Medicaid<br/>           Expansion</b><br><b>No Personal<br/>           Physician:</b><br>-4.1%, 95% CI<br>[-5.7, -2.5]. | <b>Unmet healthcare<br/>           need, mental<br/>           health:</b><br>OR = 0.57, 95% CI<br>[0.39, 0.83], p<br>< .01 (2015);<br><b>Unmet Need,<br/>           Prescription<br/>           drugs:</b><br>OR = 0.60, 95% CI<br>[0.45, 0.80], p<br>< .0001 (2015).<br><b>Johnston (2018),<br/>           Post-Medicaid<br/>           Expansion</b><br><b>Needed but could<br/>           not see a doctor<br/>           due to the cost:</b><br>-3.8%, p < .05 (All<br>Women < 100%<br>FPL).<br><b>Margerison<br/>           (2020),<br/>           Post-Medicaid<br/>           Expansion</b><br><b>Avoided seeking<br/>           care due to cost:</b><br>-7.4%, 95% CI [-<br>12.2, -2.6], p < .05.<br><b>Simon (2017),<br/>           Post-Medicaid<br/>           Expansion</b><br><b>Cost a barrier to<br/>           care:</b> |                                               |                                                                              |                                              |                                                     |                                              |

| Andersen's domains |                      | Measures of potential access                                                                                                                                                                                                                                                                                                                                                                                                                                                                                                                                                         |                                                    |                                                                                                                                     | Measures of realized access                   |                                                                              |                                              |                                                     |                                              |
|--------------------|----------------------|--------------------------------------------------------------------------------------------------------------------------------------------------------------------------------------------------------------------------------------------------------------------------------------------------------------------------------------------------------------------------------------------------------------------------------------------------------------------------------------------------------------------------------------------------------------------------------------|----------------------------------------------------|-------------------------------------------------------------------------------------------------------------------------------------|-----------------------------------------------|------------------------------------------------------------------------------|----------------------------------------------|-----------------------------------------------------|----------------------------------------------|
| Type               | Determinants/factors | Insurance coverage/type                                                                                                                                                                                                                                                                                                                                                                                                                                                                                                                                                              | Usual source of care/regular primary care provider | Barriers to care, delayed, foregone care, unmet need                                                                                | Utilization (use/non-use or frequency of use) | Preventive health visits (annual physical exam/routine checkup in last year) | Preventive health screening (blood pressure) | Preventive health screening (cholesterol screening) | Preventive health screening (Influenza shot) |
|                    |                      | [-8.6, -6.2] (Uninsured);<br>3.6%, 95% CI [2.5, 4.7] (Medicaid);<br>NS (Private, group);<br>3.1%, 95% CI [2.1, 4.1] (Private, nongroup);<br>NS (Other).<br><u><b>Johnston 2018),</b></u><br><u><b>Post-Medicaid Expansion</b></u><br><b>Uninsured:</b><br>-13.2%, p < .001 (All Women < 100% FPL).<br><u><b>Jones &amp; Sonfield, 2016),</b></u><br><u><b>Post-Medicaid Expansion</b></u><br><b>Currently uninsured:</b><br>OR = 2.01, 95% CI [1.64-2.47], p < .001 (Lived in non-expansion state)<br>(Ref = Lived in Medicaid expansion state).<br><u><b>Margerison (2020),</b></u> |                                                    | NS.<br><b>Sommers (2015),</b><br><u><b>Post Medicaid Expansion</b></u><br><b>Cannot Afford Care:</b><br>-4.2%, 95% CI [-5.9, -2.5]. |                                               |                                                                              |                                              |                                                     |                                              |

| Andersen's domains |                      | Measures of potential access                                                                                                                                                                                                                                                                                                                                                                                                                                                                                                                                                                                                                                                                                   |                                                    |                                                      | Measures of realized access                   |                                                                              |                                              |                                                     |                                              |
|--------------------|----------------------|----------------------------------------------------------------------------------------------------------------------------------------------------------------------------------------------------------------------------------------------------------------------------------------------------------------------------------------------------------------------------------------------------------------------------------------------------------------------------------------------------------------------------------------------------------------------------------------------------------------------------------------------------------------------------------------------------------------|----------------------------------------------------|------------------------------------------------------|-----------------------------------------------|------------------------------------------------------------------------------|----------------------------------------------|-----------------------------------------------------|----------------------------------------------|
| Type               | Determinants/factors | Insurance coverage/type                                                                                                                                                                                                                                                                                                                                                                                                                                                                                                                                                                                                                                                                                        | Usual source of care/regular primary care provider | Barriers to care, delayed, foregone care, unmet need | Utilization (use/non-use or frequency of use) | Preventive health visits (annual physical exam/routine checkup in last year) | Preventive health screening (blood pressure) | Preventive health screening (cholesterol screening) | Preventive health screening (Influenza shot) |
|                    |                      | <p><b><u>Post-Medicaid Expansion</u></b><br/>           9.0%, 95% CI [2.9, 15.2], p &lt;.05 (Has healthcare coverage).<br/> <b><u>Simon (2017), Post-Medicaid Expansion</u></b><br/>           Has insurance:<br/>           NS.<br/> <b><u>Sommers (2014), Post-Medicaid Expansion</u></b><br/> <b><u>D.C versus Virginia:</u></b><br/>           NS (Medicaid);<br/>           NS (Uninsured);<br/>           NS (Private insurance);<br/> <b><u>Connecticut versus other NE States:</u></b><br/>           1.5%, p &lt; .01 (Medicaid);<br/>           -2.8%, p &lt; .01 (Uninsured);<br/>           - 2.6%, p &lt; .01 (Private insurance).<br/> <b><u>Sommers (2015), Post-Medicaid Expansion</u></b></p> |                                                    |                                                      |                                               |                                                                              |                                              |                                                     |                                              |



**Notes**

NS - Non-significant findings.
