# Supplementary material for: Factors affecting women’s access to primary care in the United States since the Affordable Care Act: A mixed-methods systematic review
Source: PLoS One. 2024 Dec 19;19(12):e0314620. doi: 10.1371/journal.pone.0314620 (PMC11658587; doi:10.1371/journal.pone.0314620)
Supplement: S4 File — (PDF) [file pone.0314620.s004.pdf]

S4 File. Quality appraisal of studies applying Mixed Methods Appraisal Tool (MMAT) Version 2018.

|                |      | SCREENING QUESTIONS |     | 1. QUALITATIVE STUDIES |      |      |            |      | 3. NON-RANDOMIZED STUDIES |      |            |      |            |            |
|----------------|------|---------------------|-----|------------------------|------|------|------------|------|---------------------------|------|------------|------|------------|------------|
| First author   | Year | S1.                 | S2. | 1.1.                   | 1.2. | 1.3. | 1.4.<br>Is | 1.5. | 3.1.                      | 3.2. | 3.3.       | 3.4. | 3.5.       | Score      |
| Ahad           | 2019 | Yes                 | Yes |                        |      |      |            |      | No                        | Yes  | Yes        | Yes  | Yes        | 4/5, 80%   |
| Chen           | 2020 | Yes                 | Yes |                        |      |      |            |      | Can't tell                | Yes  | Yes        | Yes  | Yes        | 4/5, 80%   |
| Courte-manche  | 2019 | Yes                 | Yes |                        |      |      |            |      | Yes                       | Yes  | Can't tell | Yes  | Yes        | 4/5, 80%   |
| Dai            | 2019 | Yes                 | Yes |                        |      |      |            |      | Yes                       | Yes  | Yes        | Yes  | Yes        | 5/5, 100%  |
| Daw            | 2019 | Yes                 | Yes |                        |      |      |            |      | Yes                       | Yes  | Yes        | Yes  | Yes        | 5/5, 100%  |
| Early          | 2018 | Yes                 | Yes |                        |      |      |            |      | Yes                       | Yes  | Can't tell | Yes  | Yes        | 4/5, 80%   |
| Farietta       | 2018 | Yes                 | Yes |                        |      |      |            |      | Yes                       | Yes  | Yes        | Yes  | Yes        | 5/5, 100%  |
| Greder         | 2019 | Yes                 | Yes | Yes                    | Yes  | Yes  | Yes        | Yes  |                           |      |            |      |            | 5/5, 100%  |
| Johnson        | 2020 | Yes                 | Yes |                        |      |      |            |      | Yes                       | Yes  | Yes        | Yes  | Can't tell | 4/5, 80%   |
| Johnston       | 2019 | Yes                 | Yes |                        |      |      |            |      | Yes                       | Yes  | Yes        | Yes  | Yes        | 5/5, 100%  |
| Jones          | 2016 | Yes                 | Yes |                        |      |      |            |      | No                        | Yes  | Yes        | Yes  | Yes        | 4/5, 80%   |
| Lee            | 2020 | Yes                 | Yes |                        |      |      |            |      | Yes                       | Yes  | Yes        | Yes  | Yes        | 5/5, 100%  |
| Lee            | 2019 | Yes                 | Yes |                        |      |      |            |      | Yes                       | Yes  | Yes        | Yes  | Yes        | 5/5, 100%% |
| Lee            | 2019 | Yes                 | Yes |                        |      |      |            |      | Yes                       | Yes  | No         | Yes  | Yes        | 4/5, 80%   |
| Luque          | 2018 | Yes                 | Yes | Yes                    | Yes  | Yes  | Yes        | Yes  |                           |      |            |      |            | 5/5, 100%  |
| DiPietro Mager | 2021 | Yes                 | Yes |                        |      |      |            |      | No                        | Yes  | Yes        | Yes  | Can't tell | 3/5, 60%   |
| Margerison     | 2020 | Yes                 | Yes |                        |      |      |            |      | Yes                       | Yes  | Yes        | Yes  | Yes        | 5/5, 100%  |
| Massetti       | 2017 | Yes                 | Yes |                        |      |      |            |      | Yes                       | Yes  | Yes        | Yes  | Yes        | 5/5, 100%  |

|               |      | SCREENING QUESTIONS |     | 1. QUALITATIVE STUDIES |      |      |            |      | 3. NON-RANDOMIZED STUDIES |            |            |      |            |           |
|---------------|------|---------------------|-----|------------------------|------|------|------------|------|---------------------------|------------|------------|------|------------|-----------|
| First author  | Year | S1.                 | S2. | 1.1.                   | 1.2. | 1.3. | 1.4. Is    | 1.5. | 3.1.                      | 3.2.       | 3.3.       | 3.4. | 3.5.       | Score     |
| Pazol         | 2018 | Yes                 | Yes |                        |      |      |            |      | Yes                       | Yes        | Yes        | No   | Can't tell | 3/5, 60%  |
| Ross Perfetti | 2019 | Yes                 | Yes | Yes                    | Yes  | Yes  | Can't tell | Yes  |                           |            |            |      |            | 4/5, 80%  |
| Seo           | 2019 | Yes                 | Yes |                        |      |      |            |      | Yes                       | Yes        | Yes        | Yes  | Yes        | 5/5, 100% |
| Simon         | 2017 | Yes                 | Yes |                        |      |      |            |      | Yes                       | Yes        | Yes        | Yes  | Yes        | 5/5, 100% |
| Sommers       | 2014 | Yes                 | Yes |                        |      |      |            |      | Yes                       | Yes        | Can't tell | Yes  | Can't tell | 3/5, 60%  |
| Sommers       | 2015 | Yes                 | Yes |                        |      |      |            |      | Can't tell                | Yes        | Yes        | Yes  | Yes        | 4/5, 80%  |
| SteelFisher   | 2019 | Yes                 | Yes |                        |      |      |            |      | Yes                       | Can't tell | Yes        | Yes  | Can't tell | 3/5, 60%  |
| Wehby         | 2018 | Yes                 | Yes |                        |      |      |            |      | Yes                       | Yes        | Yes        | Yes  | Yes        | 5/5, 100% |
